# Supplementary material for: Small Mutations in Bordetella pertussis Are Associated with Selective Sweeps
Source: PLoS One. 2012 Sep 28;7(9):e46407. doi: 10.1371/journal.pone.0046407 (PMC3460923; doi:10.1371/journal.pone.0046407)
Supplement: Table S1 — Characteristics of 704 Bordetella pertussis strains used in this study. Strains were isolated in the period 1949–2010. PtxP, ptxA, prn and fim3 alleles were determined for all strains. The fim2 allele was determined for 272 strains. SNP typing was performed for 198 strains and concatenated SNP sequences are indicated. (XLS) [file pone.0046407.s002.xls]

## Sheet: Sheet1
Strain	Isolationyear	PtxP	PtxA	Prn	Prn2	Fim3	AT (ptxP-ptxA-prn-fim3)	AT	Fim2	Serotype	Sequence Type	Concatenated SNP sequence
B0558	1949	PtxP1	PtxS1-2	Prn_Region1-1	Prn1	Fim3-1	ptxP1-ptxA2-prn1-fim31	III	1	st3	27	CGCCGGCCTTAGAGCGAGCCCGTTTGTGCAGACATGGACGCACCCGCAGACTATTGCCCGGGCCGCGGGGTACGTAGGGCATCAC
B1195	1949	PtxP1	PtxS1-2	Prn_Region1-1	Prn1	Fim3-1	ptxP1-ptxA2-prn1-fim31	III	1	st2	26	CGCCGGCCTTAGAGCGAGCCCGTTTGTGCAGACATGGACGCACCCGCAGACTATTGCCCGGGCCGCGGGGTACGCAGGGCATCAC
B1196	1949	PtxP1	PtxS1-2	Prn_Region1-1	Prn1	Fim3-1	ptxP1-ptxA2-prn1-fim31	III	nd	st2,3	28	CGCCGGCCCTAGAGCGAGCCCGTTTGTGCAGGCATGGGCGCACCCGCAGACTATTGCTCGAGCCGCGGGGTACGCAGGGCACCGC
B0304	1950	PtxP1	PtxS1-1	Prn_Region1-1	Prn1	Fim3-1	ptxP1-ptxA1-prn1-fim31	IV	nd	nd	nd
B0339	1950	PtxP1	PtxS1-2	Prn_Region1-1	Prn1	Fim3-1	ptxP1-ptxA2-prn1-fim31	III	nd	nd	nd
B0342	1950	PtxP1	PtxS1-2	Prn_Region1-1	Prn1	Fim3-1	ptxP1-ptxA2-prn1-fim31	III	nd	st2,3	nd
B0444	1950	PtxP2	PtxS1-4	Prn_Region1-7	Prn7	Fim3-1	ptxP2-ptxA4-prn7-fim31	II	nd	nd	nd
B0496	1950	PtxP2	PtxS1-4	Prn_Region1-7	Prn7	Fim3-1	ptxP2-ptxA4-prn7-fim31	II	nd	st2	nd
B0497	1950	PtxP2	PtxS1-4	Prn_Region1-7	Prn7	Fim3-1	ptxP2-ptxA4-prn7-fim31	II	2	st3	nd
B0498	1950	PtxP1	PtxS1-1	Prn_Region1-1	Prn1	Fim3-1	ptxP1-ptxA1-prn1-fim31	IV	nd	nd	nd
B0559	1950	PtxP2	PtxS1-4	Prn_Region1-7	Prn7	Fim3-1	ptxP2-ptxA4-prn7-fim31	II	nd	nd	nd
B0560	1950	PtxP2	PtxS1-4	Prn_Region1-7	Prn7	Fim3-1	ptxP2-ptxA4-prn7-fim31	II	nd	nd	nd
B0561	1950	PtxP2	PtxS1-4	Prn_Region1-7	Prn7	Fim3-1	ptxP2-ptxA4-prn7-fim31	II	nd	nd	nd
B0562	1950	PtxP1	PtxS1-1	Prn_Region1-1	Prn1	Fim3-1	ptxP1-ptxA1-prn1-fim31	IV	nd	st2	nd
B0563	1950	PtxP1	PtxS1-2	Prn_Region1_1	Prn1	Fim3-1	ptxP1-ptxA2-prn1-fim31	III	nd	nd	nd
B0564	1950	PtxP2	PtxS1-4	Prn_Region1-7	Prn7	Fim3-1	ptxP2-ptxA4-prn7-fim31	II	2	st3	nd
B0565	1950	PtxP1	PtxS1-2	Prn_Region1-1	Prn1	Fim3-1	ptxP1-ptxA2-prn1-fim31	III	nd	nd	nd
B0568	1950	PtxP1	PtxS1-2	Prn_Region1-1	Prn1	Fim3-1	ptxP1-ptxA2-prn1-fim31	III	nd	st2,3	26	CGCCGGCCTTAGAGCGAGCCCGTTTGTGCAGACATGGACGCACCCGCAGACTATTGCCCGGGCCGCGGGGTACGCAGGGCATCAC
B1193	1950	PtxP2	PtxS1-4	Prn_Region1-7	Prn7	Fim3-1	ptxP2-ptxA4-prn7-fim31	II	2	st2,3	21	CGCCGACCCCGGATCAGACCTGCCCACGTAGGTACGTACGCCCCTATGTACGATTGCCCAGGCTGCAGGGCGCACAGGGTGCCGT
B1197	1950	PtxP1	PtxS1-2	Prn_Region1-1	Prn1	Fim3-1	ptxP1-ptxA2-prn1-fim31	III	nd	st2	25	CGCCGGCCTTAGAGCGAGCCCGTTTGTGCAGACATGGACGCACCCGCAGACTATTGCCCGGGCCGCGGGGTACGCAGGGCATCGC
B1198	1950	PtxP2	PtxS1-4	Prn_Region1-7	Prn7	Fim3-1	ptxP2-ptxA4-prn7-fim31	II	2	st2,3	22	CGCCGACCCCGGATCAAACCTGCCCACGTAGGTACGTACGCCCCTATGTACGATTGCCCAGGCTGCAGGGCGCACAGGGTGCCGT
B1200	1950	PtxP1	PtxS1-2	Prn_Region1-1	Prn1	Fim3-1	ptxP1-ptxA2-prn1-fim31	III	nd	st2,3	26	CGCCGGCCTTAGAGCGAGCCCGTTTGTGCAGACATGGACGCACCCGCAGACTATTGCCCGGGCCGCGGGGTACGCAGGGCATCAC
B0334	1951	PtxP1	PtxS1-2	Prn_Region1-1	Prn1	Fim3-1	ptxP1-ptxA2-prn1-fim31	III	1	st3	nd
B0335	1951	PtxP2	PtxS1-4	Prn_Region1-7	Prn7	Fim3-1	ptxP2-ptxA4-prn7-fim31	II	2	st2,3	nd
B0337	1951	PtxP1	PtxS1-2	Prn_Region1-1	Prn1	Fim3-1	ptxP1-ptxA2-prn1-fim31	III	nd	nd	nd
B0338	1951	PtxP2	PtxS1-4	Prn_Region1-7	Prn7	Fim3-1	ptxP2-ptxA4-prn7-fim31	II	nd	nd	nd
B0340	1951	PtxP1	PtxS1-2	Prn_Region1-1	Prn1	Fim3-1	ptxP1-ptxA2-prn1-fim31	III	nd	st2,3	nd
B0341	1951	PtxP1	PtxS1-2	Prn_Region1-1	Prn1	Fim3-1	ptxP1-ptxA2-prn1-fim31	III	nd	nd	nd
B0566	1951	PtxP2	PtxS1-4	Prn_Region1-7	Prn7	Fim3-1	ptxP2-ptxA4-prn7-fim31	II	nd	nd	nd
B0567	1951	PtxP2	PtxS1-4	Prn_Region1-7	Prn7	Fim3-1	ptxP2-ptxA4-prn7-fim31	II	2	st2,3	20	CGCCGACCCCGGATCAGACCTGCCCACGCAGGCACGTACGCCCCTATGTACGATTGCCCAGGCTGCAGGGCGCACAGGGTGCCGT
B0569	1951	PtxP2	PtxS1-4	Prn_Region1-7	Prn7	Fim3-1	ptxP2-ptxA4-prn7-fim31	II	nd	st2,3	nd
B1202	1951	PtxP1	PtxS1-2	Prn_Region1-1	Prn1	Fim3-1	ptxP1-ptxA2-prn1-fim31	III	nd	st2,3	26	CGCCGGCCTTAGAGCGAGCCCGTTTGTGCAGACATGGACGCACCCGCAGACTATTGCCCGGGCCGCGGGGTACGCAGGGCATCAC
B0296	1952	PtxP1	PtxS1-2	Prn_Region1-1	Prn1	Fim3-1	ptxP1-ptxA2-prn1-fim31	III	nd	st2	3	CGCCGGCCCTAGAGCGAGCCCGTTTGTGCAGGCATGGACGCACCCGCGGACTATTGCCCGGGCCGCGGGGTACGCAGGGCACCGC
B0336	1952	PtxP1	PtxS1-2	Prn_Region1-1	Prn1	Fim3-1	ptxP1-ptxA2-prn1-fim31	III	1	st3	3	CGCCGGCCCTAGAGCGAGCCCGTTTGTGCAGGCATGGACGCACCCGCGGACTATTGCCCGGGCCGCGGGGTACGCAGGGCACCGC
B0441	1952	PtxP2	PtxS1-4	Prn_Region1-7	Prn7	Fim3-1	ptxP2-ptxA4-prn7-fim31	II	2	st2,3	nd
B0570	1952	PtxP1	PtxS1-2	Prn_Region1-1	Prn1	Fim3-1	ptxP1-ptxA2-prn1-fim31	III	nd	st2,3	nd
B0571	1952	PtxP1	PtxS1-2	Prn_Region1-1	Prn1	Fim3-1	ptxP1-ptxA2-prn1-fim31	III	nd	st3	nd
B0572	1952	PtxP1	PtxS1-2	Prn_Region1-1	Prn1	Fim3-1	ptxP1-ptxA2-prn1-fim31	III	1	st2	26	CGCCGGCCTTAGAGCGAGCCCGTTTGTGCAGACATGGACGCACCCGCAGACTATTGCCCGGGCCGCGGGGTACGCAGGGCATCAC
B1203	1952	PtxP1	PtxS1-2	Prn_Region1-1	Prn1	Fim3-1	ptxP1-ptxA2-prn1-fim31	III	nd	st2	nd
B0443	1953	PtxP1	PtxS1-2	Prn_Region1-1	Prn1	Fim3-1	ptxP1-ptxA2-prn1-fim31	III	nd	nd	nd
B1205	1953	PtxP1	PtxS1-2	Prn_Region1-1	Prn1	Fim3-1	ptxP1-ptxA2-prn1-fim31	III	nd	st2	nd
B1207	1953	PtxP2	PtxS1-4	Prn_Region1-7	Prn7	Fim3-1	ptxP2-ptxA4-prn7-fim31	II	2	st2,3	21	CGCCGACCCCGGATCAGACCTGCCCACGTAGGTACGTACGCCCCTATGTACGATTGCCCAGGCTGCAGGGCGCACAGGGTGCCGT
B0442	1954	PtxP4	PtxS1-5	Prn_Region1-10	Prn10	Fim3-1	ptxP4-ptxA5-prn10-fim31	I	1	st2	19	CGCCGGCCCCGGATCGGGCCCGCCCGCGCAGGCACGTACGTCCCCACGGACGATTGCCCGGGCCGCGGGGCGCGCAGGGCGCCGC
B1363	1955	PtxP2	PtxS1-4	Prn_Region1-7	Prn7	Fim3-1	ptxP2-ptxA4-prn7-fim31	II	2	st2	nd
B1377	1955	PtxP2	PtxS1-4	Prn_Region1-7	Prn7	Fim3-1	ptxP2-ptxA4-prn7-fim31	II	nd	st2,3	nd
B1378	1955	PtxP2	PtxS1-4	Prn_Region1-7	Prn7	Fim3-1	ptxP2-ptxA4-prn7-fim31	II	2	st2,3	21	CGCCGACCCCGGATCAGACCTGCCCACGTAGGTACGTACGCCCCTATGTACGATTGCCCAGGCTGCAGGGCGCACAGGGTGCCGT
B1380	1956	PtxP1	PtxS1-2	Prn_Region1-1	Prn1	Fim3-1	ptxP1-ptxA2-prn1-fim31	III	1	st2,3	26	CGCCGGCCTTAGAGCGAGCCCGTTTGTGCAGACATGGACGCACCCGCAGACTATTGCCCGGGCCGCGGGGTACGCAGGGCATCAC
B1381	1956	PtxP1	PtxS1-2	Prn_Region1-1	Prn1	Fim3-1	ptxP1-ptxA2-prn1-fim31	III	nd	st2	25	CGCCGGCCTTAGAGCGAGCCCGTTTGTGCAGACATGGACGCACCCGCAGACTATTGCCCGGGCCGCGGGGTACGCAGGGCATCGC
B1364	1957	PtxP1	PtxS1-2	Prn_Region1-1	Prn1	Fim3-1	ptxP1-ptxA2-prn1-fim31	III	1	st3	nd
B1382	1957	PtxP2	PtxS1-4	Prn_Region1-7	Prn7	Fim3-1	ptxP2-ptxA4-prn7-fim31	II	nd	nd	nd
B1383	1957	PtxP1	PtxS1-2	Prn_Region1-1	Prn1	Fim3-1	ptxP1-ptxA2-prn1-fim31	III	1	st2,3	26	CGCCGGCCCTAGAGCGAGCCCGTTTGTGCAGGCATGGGCGCACCCGCAGACTATTGCCCGAGCCGCGGGGTACGCAGGGCACCGC
B1384	1957	PtxP2	PtxS1-4	Prn_Region1-7	Prn7	Fim3-1	ptxP2-ptxA4-prn7-fim31	II	nd	st2,3	nd
B1365	1958	PtxP1	PtxS1-2	Prn_Region1-1	Prn1	Fim3-1	ptxP1-ptxA2-prn1-fim31	III	1	st2,3	nd
B1379	1958	PtxP1	PtxS1-2	Prn_Region1-1	Prn1	Fim3-1	ptxP1-ptxA2-prn1-fim31	III	nd	st2	26	CGCCGGCCTTAGAGCGAGCCCGTTTGTGCAGACATGGACGCACCCGCAGACTATTGCCCGGGCCGCGGGGTACGCAGGGCATCAC
B0573	1965	PtxP1	PtxS1-2	Prn_Region1-1	Prn1	Fim3-1	ptxP1-ptxA2-prn1-fim31	III	1	st3	nd
B1208	1965	PtxP1	PtxS1-2	Prn_Region1-1	Prn1	Fim3-1	ptxP1-ptxA2-prn1-fim31	III	1	st3	4	CGCCGGCCCTAGAGCGAGCCCGTTTGTGCAGGCATGGGCGCACCCGCAGACTATTGCCCGAGCCGCGGGGTACGCAGGGCACCGC
B1317	1965	PtxP1	PtxS1-1	Prn_Region1-1	Prn1	Fim3-1	ptxP1-ptxA1-prn1-fim31	IV	nd	st3	nd
B1367	1965	PtxP1	PtxS1-1	Prn_Region1-1	Prn1	Fim3-1	ptxP1-ptxA1-prn1-fim31	IV	1	st3	nd
B1368	1965	PtxP1	PtxS1-1	Prn_Region1-1	Prn1	Fim3-1	ptxP1-ptxA1-prn1-fim31	IV	1	st3	6	CGCCAGCCCTAGAGCGAGCCCATTTGTGCAGGCATGGGCGCACCCGCAGACTGTTGCTCGAGCCTCGGAGTACGCAGGACACCGC
B1370	1965	PtxP1	PtxS1-2	Prn_Region1-1	Prn1	Fim3-1	ptxP1-ptxA2-prn1-fim31	III	nd	st3	4	CGCCGGCCCTAGAGCGAGCCCGTTTGTGCAGGCATGGGCGCACCCGCAGACTATTGCCCGAGCCGCGGGGTACGCAGGGCACCGC
B1371	1965	PtxP1	PtxS1-1	Prn_Region1-1	Prn1	Fim3-1	ptxP1-ptxA1-prn1-fim31	IV	nd	st3	6	CGCCAGCCCTAGAGCGAGCCCATTTGTGCAGGCATGGGCGCACCCGCAGACTGTTGCTCGAGCCTCGGAGTACGCAGGACACCGC
B1374	1965	PtxP1	PtxS1-1	Prn_Region1-1	Prn1	Fim3-1	ptxP1-ptxA1-prn1-fim31	IV	nd	st2	29	CGCCGGCCCTAGAGCGAGCCCGTTTGTGCAGGCATGGGCGCACCCGCAGACTATTGCTCGAGCCTCGGGGTACGCAGGGCACCGC
B1375	1965	PtxP1	PtxS1-1	Prn_Region1-1	Prn1	Fim3-1	ptxP1-ptxA1-prn1-fim31	IV	1	st2	29	CGCCGGCCCTAGAGCGAGCCCGTTTGTGCAGGCATGGGCGCACCCGCAGACTATTGCTCGAGCCTCGGGGTACGCAGGGCACCGC
B1376	1965	PtxP1	PtxS1-2	Prn_Region1-1	Prn1	Fim3-1	ptxP1-ptxA2-prn1-fim31	III	nd	st3	4	CGCCGGCCCTAGAGCGAGCCCGTTTGTGCAGGCATGGGCGCACCCGCAGACTATTGCCCGAGCCGCGGGGTACGCAGGGCACCGC
B0574	1966	PtxP1	PtxS1-2	Prn_Region1-1	Prn1	Fim3-1	ptxP1-ptxA2-prn1-fim31	III	1	st3	4	CGCCGGCCCTAGAGCGAGCCCGTTTGTGCAGGCATGGGCGCACCCGCAGACTATTGCCCGAGCCGCGGGGTACGCAGGGCACCGC
B0575	1966	PtxP1	PtxS1-1	Prn_Region1-1	Prn1	Fim3-1	ptxP1-ptxA1-prn1-fim31	IV	1	st3	nd
B1210	1966	PtxP1	PtxS1-1	Prn_Region1-1	Prn1	Fim3-1	ptxP1-ptxA1-prn1-fim31	IV	nd	st3	6	CGCCAGCCCTAGAGCGAGCCCATTTGTGCAGGCATGGGCGCACCCGCAGACTGTTGCTCGAGCCTCGGAGTACGCAGGACACCGC
B1211	1966	PtxP1	PtxS1-1	Prn_Region1-1	Prn1	Fim3-1	ptxP1-ptxA1-prn1-fim31	IV	nd	st3	nd
B1217	1966	PtxP1	PtxS1-1	Prn_Region1-1	Prn1	Fim3-1	ptxP1-ptxA1-prn1-fim31	IV	nd	st3	6	CGCCAGCCCTAGAGCGAGCCCATTTGTGCAGGCATGGGCGCACCCGCAGACTGTTGCTCGAGCCTCGGAGTACGCAGGACACCGC
B1366	1966	PtxP1	PtxS1-2	Prn_Region1-1	Prn1	Fim3-1	ptxP1-ptxA2-prn1-fim31	III	1	st3	4	CGCCGGCCCTAGAGCGAGCCCGTTTGTGCAGGCATGGGCGCACCCGCAGACTATTGCCCGAGCCGCGGGGTACGCAGGGCACCGC
B1372	1966	PtxP1	PtxS1-1	Prn_Region1-1	Prn1	Fim3-1	ptxP1-ptxA1-prn1-fim31	IV	nd	st3	nd
B0576	1967	PtxP1	PtxS1-2	Prn_Region1-1	Prn1	Fim3-1	ptxP1-ptxA2-prn1-fim31	III	1	st3	4	CGCCGGCCCTAGAGCGAGCCCGTTTGTGCAGGCATGGGCGCACCCGCAGACTATTGCCCGAGCCGCGGGGTACGCAGGGCACCGC
B0577	1967	PtxP1	PtxS1-1	Prn_Region1-1	Prn1	Fim3-1	ptxP1-ptxA1-prn1-fim31	IV	1	nd	nd
B1213	1967	PtxP1	PtxS1-1	Prn_Region1-1	Prn1	Fim3-1	ptxP1-ptxA1-prn1-fim31	IV	1	st3	6	CGCCAGCCCTAGAGCGAGCCCATTTGTGCAGGCATGGGCGCACCCGCAGACTGTTGCTCGAGCCTCGGAGTACGCAGGACACCGC
B1369	1967	PtxP1	PtxS1-1	Prn_Region1-1	Prn1	Fim3-1	ptxP1-ptxA1-prn1-fim31	IV	1	st3	nd
B0578	1968	PtxP1	PtxS1-1	Prn_Region1-1	Prn1	Fim3-1	ptxP1-ptxA1-prn1-fim31	IV	nd	st3	nd
B0579	1969	PtxP1	PtxS1-1	Prn_Region1-1	Prn1	Fim3-1	ptxP1-ptxA1-prn1-fim31	IV	nd	st3	nd
B0580	1969	PtxP1	PtxS1-1	Prn_Region1-1	Prn1	Fim3-1	ptxP1-ptxA1-prn1-fim31	IV	1	st3	nd
B1219	1969	PtxP1	PtxS1-1	Prn_Region1-1	Prn1	Fim3-1	ptxP1-ptxA1-prn1-fim31	IV	1	st3	nd
B0581	1970	PtxP1	PtxS1-1	Prn_Region1-1	Prn1	Fim3-1	ptxP1-ptxA1-prn1-fim31	IV	nd	st3	30	CGCCAGCCCTAGAGCGAGCCCATTTGTGCAGGCATGGGCGCACCCGCAGACTGTTGCTCGGGCCTCGGAGTACGCAGGACACCGC
B0582	1972	PtxP1	PtxS1-1	Prn_Region1-1	Prn1	Fim3-1	ptxP1-ptxA1-prn1-fim31	IV	1	st3	6	CGCCAGCCCTAGAGCGAGCCCATTTGTGCAGGCATGGGCGCACCCGCAGACTGTTGCTCGAGCCTCGGAGTACGCAGGACACCGC
B0583	1976	PtxP1	PtxS1-1	Prn_Region1-1	Prn1	Fim3-1	ptxP1-ptxA1-prn1-fim31	IV	1	st3	6	CGCCAGCCCTAGAGCGAGCCCATTTGTGCAGGCATGGGCGCACCCGCAGACTGTTGCTCGAGCCTCGGAGTACGCAGGACACCGC
B0584	1977	PtxP6	PtxS1-2	Prn_Region1-1	Prn1	Fim3-1	ptxP6-ptxA2-prn1-fim31	other	1	st2	nd
B0585	1977	PtxP6	PtxS1-2	Prn_Region1-1	Prn1	Fim3-1	ptxP6-ptxA2-prn1-fim31	other	nd	st2	nd
B1223	1977	PtxP1	PtxS1-2	Prn_Region1-1	Prn1	Fim3-1	ptxP1-ptxA2-prn1-fim31	III	nd	st2,3	nd
B3006	1977	PtxP1	PtxS1-1	Prn_Region1-2	Prn2	Fim3-1	ptxP1-ptxA1-prn2/3-fim31	V	nd	st2	7	CGCCAGCCCTAGAGCGAGCCCATTTGTACAGGCATGGGCGCACCCGCAGACTGTTGCTCGAGCCTCGGAGTACGCAGGACACCGC
B0295	1978	PtxP1	PtxS1-2	Prn_Region1-1	Prn1	Fim3-1	ptxP1-ptxA2-prn1-fim31	III	nd	nd	23	CGCCGGCCCCGGATCGGGTCCGCTTGTGCAGGCATGTACGTCCTCACGGACGATTACCCGGTCCGCGGGGTGCGCAGGGCACCGC
B0440	1978	PtxP1	PtxS1-1	Prn_Region1-1	Prn1	Fim3-1	ptxP1-ptxA1-prn1-fim31	IV	1	st2	nd
B0586	1980	PtxP1	PtxS1-1	Prn_Region1-1	Prn1	Fim3-1	ptxP1-ptxA1-prn1-fim31	IV	nd	st2	nd
B0587	1980	PtxP1	PtxS1-1	Prn_Region1-1	Prn1	Fim3-1	ptxP1-ptxA1-prn1-fim31	IV	nd	st2	nd
B0588	1980	PtxP1	PtxS1-1	Prn_Region1-1	Prn1	Fim3-1	ptxP1-ptxA1-prn1-fim31	IV	nd	st2	nd
B0589	1980	PtxP1	PtxS1-1	Prn_Region1-1	Prn1	Fim3-1	ptxP1-ptxA1-prn1-fim31	IV	nd	st2,3	28	CGCCGGCCCTAGAGCGAGCCCGTTTGTGCAGGCATGGGCGCACCCGCAGACTATTGCTCGAGCCGCGGGGTACGCAGGGCACCGC
B0590	1980	PtxP1	PtxS1-1	Prn_Region1-1	Prn1	Fim3-1	ptxP1-ptxA1-prn1-fim31	IV	1	st2	28	CGCCGGCCCTAGAGCGAGCCCGTTTGTGCAGGCATGGGCGCACCCGCAGACTATTGCTCGAGCCGCGGGGTACGCAGGGCACCGC
B0664	1980	PtxP1	PtxS1-1	Prn_Region1-1	Prn1	Fim3-1	ptxP1-ptxA1-prn1-fim31	IV	nd	st0	nd
B0665	1980	PtxP1	PtxS1-1	Prn_Region1-1	Prn1	Fim3-1	ptxP1-ptxA1-prn1-fim31	IV	nd	st2	nd
B0666	1980	PtxP1	PtxS1-1	Prn_Region1-1	Prn1	Fim3-1	ptxP1-ptxA1-prn1-fim31	IV	nd	st2	nd
B0674	1980	PtxP1	PtxS1-1	Prn_Region1-1	Prn1	Fim3-1	ptxP1-ptxA1-prn1-fim31	IV	nd	st2	nd
B1225	1980	PtxP1	PtxS1-1	Prn_Region1-2	Prn2	Fim3-1	ptxP1-ptxA1-prn2/3-fim31	V	nd	st2,3	7	CGCCAGCCCTAGAGCGAGCCCATTTGTACAGGCATGGGCGCACCCGCAGACTGTTGCTCGAGCCTCGGAGTACGCAGGACACCGC
B1228	1980	PtxP1	PtxS1-1	Prn_Region1-1	Prn1	Fim3-1	ptxP1-ptxA1-prn1-fim31	IV	nd	nd	nd
B3007	1980	PtxP1	PtxS1-1	Prn_Region1-2	Prn2	Fim3-1	ptxP1-ptxA1-prn2/3-fim31	V	nd	st2,3	7	CGCCAGCCCTAGAGCGAGCCCATTTGTACAGGCATGGGCGCACCCGCAGACTGTTGCTCGAGCCTCGGAGTACGCAGGACACCGC
B3008	1980	PtxP1	PtxS1-1	Prn_Region1-1	Prn1	Fim3-1	ptxP1-ptxA1-prn1-fim31	IV	1	st2	nd
B3009	1980	PtxP1	PtxS1-1	Prn_Region1-1	Prn1	Fim3-1	ptxP1-ptxA1-prn1-fim31	IV	nd	st2	28	CGCCGGCCCTAGAGCGAGCCCGTTTGTGCAGGCATGGGCGCACCCGCAGACTATTGCTCGAGCCGCGGGGTACGCAGGGCACCGC
B3010	1980	PtxP1	PtxS1-1	Prn_Region1-1	Prn1	Fim3-1	ptxP1-ptxA1-prn1-fim31	IV	nd	st3	nd
B3011	1980	PtxP1	PtxS1-1	Prn_Region1-1	Prn1	Fim3-1	ptxP1-ptxA1-prn1-fim31	IV	nd	st2	nd
B3012	1980	PtxP1	PtxS1-1	Prn_Region1-1	Prn1	Fim3-1	ptxP1-ptxA1-prn1-fim31	IV	nd	st2	nd
B3013	1980	PtxP1	PtxS1-1	Prn_Region1-1	Prn1	Fim3-1	ptxP1-ptxA1-prn1-fim31	IV	nd	st2	nd
B3014	1980	PtxP1	PtxS1-1	Prn_Region1-1	Prn1	Fim3-1	ptxP1-ptxA1-prn1-fim31	IV	nd	st3	nd
B0667	1981	PtxP1	PtxS1-1	Prn_Region1-1	Prn1	Fim3-1	ptxP1-ptxA1-prn1-fim31	IV	nd	st2	nd
B0668	1981	PtxP1	PtxS1-1	Prn_Region1-1	Prn1	Fim3-1	ptxP1-ptxA1-prn1-fim31	IV	nd	st2	nd
B0669	1981	PtxP1	PtxS1-1	Prn_Region1-1	Prn1	Fim3-1	ptxP1-ptxA1-prn1-fim31	IV	nd	st2	nd
B0670	1981	PtxP1	PtxS1-1	Prn_Region1-1	Prn1	Fim3-1	ptxP1-ptxA1-prn1-fim31	IV	nd	st2	28	CGCCGGCCCTAGAGCGAGCCCGTTTGTGCAGGCATGGGCGCACCCGCAGACTATTGCTCGAGCCGCGGGGTACGCAGGGCACCGC
B0671	1981	PtxP1	PtxS1-1	Prn_Region1-1	Prn1	Fim3-1	ptxP1-ptxA1-prn1-fim31	IV	nd	st2	nd
B0672	1981	PtxP1	PtxS1-1	Prn_Region1-3	Prn3	Fim3-1	ptxP1-ptxA1-prn2/3-fim31	V	1	st2	7	CGCCAGCCCTAGAGCGAGCCCATTTGTACAGGCATGGGCGCACCCGCAGACTGTTGCTCGAGCCTCGGAGTACGCAGGACACCGC
B0673	1981	PtxP1	PtxS1-1	Prn_Region1-2	Prn2	Fim3-1	ptxP1-ptxA1-prn2/3-fim31	V	nd	st2	7	CGCCAGCCCTAGAGCGAGCCCATTTGTACAGGCATGGGCGCACCCGCAGACTGTTGCTCGAGCCTCGGAGTACGCAGGACACCGC
B0675	1981	PtxP1	PtxS1-1	Prn_Region1-2	Prn2	Fim3-1	ptxP1-ptxA1-prn2/3-fim31	V	nd	st2	nd
B0676	1981	PtxP1	PtxS1-1	Prn_Region1-1	Prn1	Fim3-1	ptxP1-ptxA1-prn1-fim31	IV	nd	st2	nd
B0677	1981	PtxP1	PtxS1-1	Prn_Region1-2	Prn2	Fim3-1	ptxP1-ptxA1-prn2/3-fim31	V	nd	st2	7	CGCCAGCCCTAGAGCGAGCCCATTTGTACAGGCATGGGCGCACCCGCAGACTGTTGCTCGAGCCTCGGAGTACGCAGGACACCGC
B0678	1981	PtxP1	PtxS1-1	Prn_Region1-1	Prn1	Fim3-1	ptxP1-ptxA1-prn1-fim31	IV	nd	st2	nd
B0679	1981	PtxP1	PtxS1-1	Prn_Region1-1	Prn1	Fim3-1	ptxP1-ptxA1-prn1-fim31	IV	nd	st2	nd
B0680	1981	PtxP1	PtxS1-1	Prn_Region1-1	Prn1	Fim3-1	ptxP1-ptxA1-prn1-fim31	IV	nd	st2	nd
B0681	1981	PtxP1	PtxS1-1	Prn_Region1-1	Prn1	Fim3-1	ptxP1-ptxA1-prn1-fim31	IV	nd	st2	nd
B0682	1981	PtxP1	PtxS1-1	Prn_Region1-1	Prn1	Fim3-1	ptxP1-ptxA1-prn1-fim31	IV	nd	st2	nd
B0592	1982	PtxP1	PtxS1-2	Prn_Region1-1	Prn1	Fim3-1	ptxP1-ptxA2-prn1-fim31	III	1	st2	nd
B0684	1982	PtxP1	PtxS1-1	Prn_Region1-1	Prn1	Fim3-1	ptxP1-ptxA1-prn1-fim31	IV	nd	st2	nd
B0685	1982	PtxP1	PtxS1-1	Prn_Region1-3	Prn3	Fim3-1	ptxP1-ptxA1-prn2/3-fim31	V	nd	st2	7	CGCCAGCCCTAGAGCGAGCCCATTTGTACAGGCATGGGCGCACCCGCAGACTGTTGCTCGAGCCTCGGAGTACGCAGGACACCGC
B0686	1982	PtxP1	PtxS1-1	Prn_Region1-2	Prn2	Fim3-1	ptxP1-ptxA1-prn2/3-fim31	V	1	st2,3	7	CGCCAGCCCTAGAGCGAGCCCATTTGTACAGGCATGGGCGCACCCGCAGACTGTTGCTCGAGCCTCGGAGTACGCAGGACACCGC
B0688	1982	PtxP1	PtxS1-1	Prn_Region1-1	Prn1	Fim3-1	ptxP1-ptxA1-prn1-fim31	IV	1	st2	nd
B0689	1982	PtxP1	PtxS1-1	Prn_Region1-1	Prn1	Fim3-1	ptxP1-ptxA1-prn1-fim31	IV	nd	st2,3	nd
B0690	1982	PtxP1	PtxS1-1	Prn_Region1-1	Prn1	Fim3-1	ptxP1-ptxA1-prn1-fim31	IV	nd	st3	nd
B0691	1982	PtxP1	PtxS1-1	Prn_Region1-1	Prn1	Fim3-1	ptxP1-ptxA1-prn1-fim31	IV	nd	st3	nd
B0692	1982	PtxP1	PtxS1-1	Prn_Region1-1	Prn1	Fim3-1	ptxP1-ptxA1-prn1-fim31	IV	nd	st3	5	CGCCGGCCCTAGAGCGAGCCCATTTGTGCAGGCATGGGCGCACCCGCAGACTGTTGCTCGAGCCTCGGAGTACGCAGGACACCGC
B0693	1982	PtxP1	PtxS1-1	Prn_Region1-1	Prn1	Fim3-1	ptxP1-ptxA1-prn1-fim31	IV	nd	st3	nd
B0593	1983	PtxP1	PtxS1-1	Prn_Region1-1	Prn1	Fim3-1	ptxP1-ptxA1-prn1-fim31	IV	1	st2	nd
B0594	1983	PtxP1	PtxS1-1	Prn_Region1-3	Prn3	Fim3-1	ptxP1-ptxA1-prn2/3-fim31	V	1	st2	7	CGCCAGCCCTAGAGCGAGCCCATTTGTACAGGCATGGGCGCACCCGCAGACTGTTGCTCGAGCCTCGGAGTACGCAGGACACCGC
B0737	1983	PtxP1	PtxS1-1	Prn_Region1-1	Prn1	Fim3-1	ptxP1-ptxA1-prn1-fim31	IV	nd	st2,3	nd
B0738	1983	PtxP1	PtxS1-1	Prn_Region1-1	Prn1	Fim3-1	ptxP1-ptxA1-prn1-fim31	IV	nd	st2,3	28	CGCCGGCCCTAGAGCGAGCCCGTTTGTGCAGGCATGGGCGCACCCGCAGACTATTGCTCGAGCCGCGGGGTACGCAGGGCACCGC
B0739	1983	PtxP1	PtxS1-1	Prn_Region1-1	Prn1	Fim3-1	ptxP1-ptxA1-prn1-fim31	IV	nd	st2,3	28	CGCCGGCCCTAGAGCGAGCCCGTTTGTGCAGGCATGGGCGCACCCGCAGACTATTGCTCGAGCCGCGGGGTACGCAGGGCACCGC
B0740	1983	PtxP1	PtxS1-1	Prn_Region1-1	Prn1	Fim3-1	ptxP1-ptxA1-prn1-fim31	IV	nd	st2	nd
B0011	1984	PtxP1	PtxS1-1	Prn_Region1-1	Prn1	Fim3-1	ptxP1-ptxA1-prn1-fim31	IV	nd	st3	nd
B0741	1984	PtxP1	PtxS1-1	Prn_Region1-1	Prn1	Fim3-1	ptxP1-ptxA1-prn1-fim31	IV	nd	st2	nd
B0742	1984	PtxP1	PtxS1-1	Prn_Region1-1	Prn1	Fim3-1	ptxP1-ptxA1-prn1-fim31	IV	nd	st2	nd
B0743	1984	PtxP1	PtxS1-1	Prn_Region1-3	Prn3	Fim3-1	ptxP1-ptxA1-prn2/3-fim31	V	nd	st2	nd
B0744	1984	PtxP1	PtxS1-1	Prn_Region1-1	Prn1	Fim3-1	ptxP1-ptxA1-prn1-fim31	IV	nd	st2	nd
B0745	1984	PtxP1	PtxS1-1	Prn_Region1-1	Prn1	Fim3-1	ptxP1-ptxA1-prn1-fim31	IV	nd	st2	nd
B0746	1984	PtxP1	PtxS1-1	Prn_Region1-1	Prn1	Fim3-1	ptxP1-ptxA1-prn1-fim31	IV	nd	st2	nd
B2926	1984	PtxP1	PtxS1-1	Prn_Region1-1	Prn1	Fim3-1	ptxP1-ptxA1-prn1-fim31	IV	nd	st2	nd
B2927	1984	PtxP1	PtxS1-1	Prn_Region1-3	Prn3	Fim3-1	ptxP1-ptxA1-prn2/3-fim31	V	1	st2	7	CGCCAGCCCTAGAGCGAGCCCATTTGTACAGGCATGGGCGCACCCGCAGACTGTTGCTCGAGCCTCGGAGTACGCAGGACACCGC
B2928	1984	PtxP1	PtxS1-1	Prn_Region1-1	Prn1	Fim3-1	ptxP1-ptxA1-prn1-fim31	IV	nd	st2	nd
B2929	1984	PtxP1	PtxS1-1	Prn_Region1-1	Prn1	Fim3-1	ptxP1-ptxA1-prn1-fim31	IV	nd	st2,3	nd
B2930	1984	PtxP1	PtxS1-1	Prn_Region1-1	Prn1	Fim3-1	ptxP1-ptxA1-prn1-fim31	IV	nd	st2,3	nd
B2931	1984	PtxP1	PtxS1-1	Prn_Region1-1	Prn1	Fim3-1	ptxP1-ptxA1-prn1-fim31	IV	nd	st2,3	nd
B2932	1984	PtxP1	PtxS1-1	Prn_Region1-2	Prn2	Fim3-1	ptxP1-ptxA1-prn2/3-fim31	V	nd	st2,3	nd
B2933	1984	PtxP1	PtxS1-1	Prn_Region1-1	Prn1	Fim3-1	ptxP1-ptxA1-prn1-fim31	IV	nd	st2,3	nd
B2934	1984	PtxP1	PtxS1-1	Prn_Region1-1	Prn1	Fim3-1	ptxP1-ptxA1-prn1-fim31	IV	1	st2,3	nd
B2936	1984	PtxP1	PtxS1-1	Prn_Region1-1	Prn1	Fim3-1	ptxP1-ptxA1-prn1-fim31	IV	nd	st2	nd
B2937	1984	PtxP1	PtxS1-1	Prn_Region1-1	Prn1	Fim3-1	ptxP1-ptxA1-prn1-fim31	IV	nd	st2	nd
B2938	1984	PtxP1	PtxS1-1	Prn_Region1-1	Prn1	Fim3-1	ptxP1-ptxA1-prn1-fim31	IV	nd	st2,3	nd
B0012	1985	PtxP1	PtxS1-2	Prn_Region1-1	Prn1	Fim3-1	ptxP1-ptxA2-prn1-fim31	III	1	st3	4	CGCCGGCCCTAGAGCGAGCCCGTTTGTGCAGGCATGGGCGCACCCGCAGACTATTGCCCGAGCCGCGGGGTACGCAGGGCACCGC
B0017	1985	PtxP1	PtxS1-2	Prn_Region1-1	Prn1	Fim3-1	ptxP1-ptxA2-prn1-fim31	III	nd	st2	nd
B0595	1985	PtxP1	PtxS1-2	Prn_Region1-1	Prn1	Fim3-1	ptxP1-ptxA2-prn1-fim31	III	nd	st2,3	nd
B0747	1985	PtxP1	PtxS1-1	Prn_Region1-3	Prn3	Fim3-1	ptxP1-ptxA1-prn2/3-fim31	V	nd	st2	7	CGCCAGCCCTAGAGCGAGCCCATTTGTACAGGCATGGGCGCACCCGCAGACTGTTGCTCGAGCCTCGGAGTACGCAGGACACCGC
B0748	1985	PtxP1	PtxS1-1	Prn_Region1-1	Prn1	Fim3-1	ptxP1-ptxA1-prn1-fim31	IV	nd	st2	nd
B0749	1985	PtxP1	PtxS1-1	Prn_Region1-1	Prn1	Fim3-1	ptxP1-ptxA1-prn1-fim31	IV	nd	st2	nd
B0750	1985	PtxP1	PtxS1-1	Prn_Region1-1	Prn1	Fim3-1	ptxP1-ptxA1-prn1-fim31	IV	nd	st2	nd
B0751	1985	PtxP1	PtxS1-1	Prn_Region1-1	Prn1	Fim3-1	ptxP1-ptxA1-prn1-fim31	IV	nd	st2	nd
B0752	1985	PtxP1	PtxS1-1	Prn_Region1-2	Prn2	Fim3-1	ptxP1-ptxA1-prn2/3-fim31	V	nd	st2	nd
B2939	1985	PtxP1	PtxS1-1	Prn_Region1-1	Prn1	Fim3-1	ptxP1-ptxA1-prn1-fim31	IV	nd	st2,3	nd
B2940	1985	PtxP1	PtxS1-1	Prn_Region1-1	Prn1	Fim3-1	ptxP1-ptxA1-prn1-fim31	IV	nd	st2	nd
B2941	1985	PtxP1	PtxS1-1	Prn_Region1-1	Prn1	Fim3-1	ptxP1-ptxA1-prn1-fim31	IV	nd	st2	nd
B2942	1985	PtxP1	PtxS1-1	Prn_Region1-1	Prn1	Fim3-1	ptxP1-ptxA1-prn1-fim31	IV	nd	st0	nd
B2943	1985	PtxP1	PtxS1-1	Prn_Region1-1	Prn1	Fim3-1	ptxP1-ptxA1-prn1-fim31	IV	nd	st2	nd
B2944	1985	PtxP1	PtxS1-1	Prn_Region1-1	Prn1	Fim3-1	ptxP1-ptxA1-prn1-fim31	IV	nd	st2	nd
B2945	1985	PtxP1	PtxS1-1	Prn_Region1-1	Prn1	Fim3-1	ptxP1-ptxA1-prn1-fim31	IV	nd	st2	nd
B2946	1985	PtxP1	PtxS1-1	Prn_Region1-1	Prn1	Fim3-1	ptxP1-ptxA1-prn1-fim31	IV	nd	st2	nd
B2947	1985	PtxP1	PtxS1-1	Prn_Region1-3	Prn3	Fim3-1	ptxP1-ptxA1-prn2/3-fim31	V	1	st2	7	CGCCAGCCCTAGAGCGAGCCCATTTGTACAGGCATGGGCGCACCCGCAGACTGTTGCTCGAGCCTCGGAGTACGCAGGACACCGC
B2948	1985	PtxP1	PtxS1-1	Prn_Region1-3	Prn3	Fim3-1	ptxP1-ptxA1-prn2/3-fim31	V	1	st2	7	CGCCAGCCCTAGAGCGAGCCCATTTGTACAGGCATGGGCGCACCCGCAGACTGTTGCTCGAGCCTCGGAGTACGCAGGACACCGC
B2949	1985	PtxP1	PtxS1-1	Prn_Region1-2	Prn2	Fim3-1	ptxP1-ptxA1-prn2/3-fim31	V	nd	st3	8	CGCCAGCCCTAGAGTGAGCCCATTTGTACAGGCATGGGCGCACCCGCAGACTGTTGCTCGAGCCTCGGAGTACGCAGGACACCGC
B0753	1986	PtxP1	PtxS1-1	Prn_Region1-1	Prn1	Fim3-1	ptxP1-ptxA1-prn1-fim31	IV	1	st2	28	CGCCGGCCCTAGAGCGAGCCCGTTTGTGCAGGCATGGGCGCACCCGCAGACTATTGCTCGAGCCGCGGGGTACGCAGGGCACCGC
B0754	1986	PtxP1	PtxS1-1	Prn_Region1-3	Prn3	Fim3-1	ptxP1-ptxA1-prn2/3-fim31	V	nd	st2	7	CGCCAGCCCTAGAGCGAGCCCATTTGTACAGGCATGGGCGCACCCGCAGACTGTTGCTCGAGCCTCGGAGTACGCAGGACACCGC
B0755	1986	PtxP1	PtxS1-1	Prn_Region1-1	Prn1	Fim3-1	ptxP1-ptxA1-prn1-fim31	IV	nd	st2	nd
B0756	1986	PtxP1	PtxS1-1	Prn_Region1-1	Prn1	Fim3-1	ptxP1-ptxA1-prn1-fim31	IV	nd	st3	nd
B0757	1986	PtxP1	PtxS1-1	Prn_Region1-1	Prn1	Fim3-1	ptxP1-ptxA1-prn1-fim31	IV	nd	st0	nd
B0758	1986	PtxP1	PtxS1-1	Prn_Region1-1	Prn1	Fim3-1	ptxP1-ptxA1-prn1-fim31	IV	nd	st3	nd
B0759	1986	PtxP1	PtxS1-1	Prn_Region1-2	Prn2	Fim3-1	ptxP1-ptxA1-prn2/3-fim31	V	nd	st3	8	CGCCAGCCCTAGAGTGAGCCCATTTGTACAGGCATGGGCGCACCCGCAGACTGTTGCTCGAGCCTCGGAGTACGCAGGACACCGC
B2950	1986	PtxP1	PtxS1-1	Prn_Region1-1	Prn1	Fim3-1	ptxP1-ptxA1-prn1-fim31	IV	nd	st2	nd
B2951	1986	PtxP1	PtxS1-1	Prn_Region1-2	Prn2	Fim3-1	ptxP1-ptxA1-prn2/3-fim31	V	nd	st2	nd
B2952	1986	PtxP1	PtxS1-1	Prn_Region1-1	Prn1	Fim3-1	ptxP1-ptxA1-prn1-fim31	IV	nd	st2	nd
B2953	1986	PtxP1	PtxS1-1	Prn_Region1-1	Prn1	Fim3-1	ptxP1-ptxA1-prn1-fim31	IV	nd	st2	nd
B2954	1986	PtxP1	PtxS1-1	Prn_Region1-1	Prn1	Fim3-1	ptxP1-ptxA1-prn1-fim31	IV	nd	st2	nd
B2955	1986	PtxP1	PtxS1-1	Prn_Region1-1	Prn1	Fim3-1	ptxP1-ptxA1-prn1-fim31	IV	nd	st2	nd
B2956	1986	PtxP1	PtxS1-1	Prn_Region1-1	Prn1	Fim3-1	ptxP1-ptxA1-prn1-fim31	IV	nd	st2	nd
B2957	1986	PtxP1	PtxS1-1	Prn_Region1-2	Prn2	Fim3-1	ptxP1-ptxA1-prn2/3-fim31	V	nd	st2	nd
B2958	1986	PtxP1	PtxS1-1	Prn_Region1-1	Prn1	Fim3-1	ptxP1-ptxA1-prn1-fim31	IV	nd	st2	nd
B2959	1986	PtxP1	PtxS1-1	Prn_Region1-1	Prn1	Fim3-1	ptxP1-ptxA1-prn1-fim31	IV	nd	st2	nd
B2960	1986	PtxP1	PtxS1-1	Prn_Region1-1	Prn1	Fim3-1	ptxP1-ptxA1-prn1-fim31	IV	nd	st2	nd
B2961	1986	PtxP1	PtxS1-1	Prn_Region1-1	Prn1	Fim3-1	ptxP1-ptxA1-prn1-fim31	IV	nd	st3	nd
B2962	1986	PtxP1	PtxS1-1	Prn_Region1-1	Prn1	Fim3-1	ptxP1-ptxA1-prn1-fim31	IV	nd	st2	nd
B0760	1987	PtxP1	PtxS1-1	Prn_Region1-1	Prn1	Fim3-1	ptxP1-ptxA1-prn1-fim31	IV	nd	st2	nd
B0761	1987	PtxP1	PtxS1-1	Prn_Region1-1	Prn1	Fim3-1	ptxP1-ptxA1-prn1-fim31	IV	nd	st2	nd
B0762	1987	PtxP1	PtxS1-2	Prn_Region1-1	Prn1	Fim3-1	ptxP1-ptxA2-prn1-fim31	III	nd	st3	nd
B0763	1987	PtxP1	PtxS1-1	Prn_Region1-1	Prn1	Fim3-1	ptxP1-ptxA1-prn1-fim31	IV	nd	st3	nd
B0764	1987	PtxP1	PtxS1-1	Prn_Region1-1	Prn1	Fim3-1	ptxP1-ptxA1-prn1-fim31	IV	nd	st2	nd
B0765	1987	PtxP1	PtxS1-1	Prn_Region1-2	Prn2	Fim3-1	ptxP1-ptxA1-prn2/3-fim31	V	1	st3	32	CGCCAGCCCTAGAGTGAGCCCATTTGTACAGGCATGGGCGCACCCGCAGACTGTTGCTCGAGCCTCGAAGTACGCAGGACACCGC
B0766	1987	PtxP1	PtxS1-1	Prn_Region1-1	Prn1	Fim3-1	ptxP1-ptxA1-prn1-fim31	IV	nd	st2	nd
B0767	1987	PtxP1	PtxS1-1	Prn_Region1-2	Prn2	Fim3-1	ptxP1-ptxA1-prn2/3-fim31	V	nd	st2,3	nd
B0768	1987	PtxP1	PtxS1-1	Prn_Region1-3	Prn3	Fim3-1	ptxP1-ptxA1-prn2/3-fim31	V	1	st2	7	CGCCAGCCCTAGAGCGAGCCCATTTGTACAGGCATGGGCGCACCCGCAGACTGTTGCTCGAGCCTCGGAGTACGCAGGACACCGC
B0769	1987	PtxP1	PtxS1-1	Prn_Region1-1	Prn1	Fim3-1	ptxP1-ptxA1-prn1-fim31	IV	nd	st2	nd
B0770	1987	PtxP1	PtxS1-1	Prn_Region1-1	Prn1	Fim3-1	ptxP1-ptxA1-prn1-fim31	IV	nd	st2	nd
B2963	1987	PtxP1	PtxS1-1	Prn_Region1-1	Prn1	Fim3-1	ptxP1-ptxA1-prn1-fim31	IV	nd	st2	nd
B2964	1987	PtxP1	PtxS1-1	Prn_Region1-1	Prn1	Fim3-1	ptxP1-ptxA1-prn1-fim31	IV	nd	st2	nd
B2965	1987	PtxP1	PtxS1-1	Prn_Region1-1	Prn1	Fim3-1	ptxP1-ptxA1-prn1-fim31	IV	nd	st2	nd
B2966	1987	PtxP1	PtxS1-1	Prn_Region1-1	Prn1	Fim3-1	ptxP1-ptxA1-prn1-fim31	IV	nd	st3	nd
B2967	1987	PtxP1	PtxS1-1	Prn_Region1-1	Prn1	Fim3-1	ptxP1-ptxA1-prn1-fim31	IV	nd	st2	nd
B2968	1987	PtxP1	PtxS1-2	Prn_Region1-1	Prn1	Fim3-1	ptxP1-ptxA2-prn1-fim31	III	nd	st2,3	24	CGCCGGCCCTAGAGCGAGCCCGTTTGTGCAGACATGGACGCACCCGCAGACTATTGCCCGGGCCGCGGGGTACGCAGGGCATCGC
B2969	1987	PtxP1	PtxS1-1	Prn_Region1-1	Prn1	Fim3-1	ptxP1-ptxA1-prn1-fim31	IV	nd	st2	nd
B2970	1987	PtxP1	PtxS1-1	Prn_Region1-1	Prn1	Fim3-1	ptxP1-ptxA1-prn1-fim31	IV	nd	st2	nd
B2971	1987	PtxP1	PtxS1-1	Prn_Region1-1	Prn1	Fim3-1	ptxP1-ptxA1-prn1-fim31	IV	nd	st2	nd
B0410	1988	PtxP1	PtxS1-1	Prn_Region1-1	Prn1	Fim3-1	ptxP1-ptxA1-prn1-fim31	IV	nd	st2	nd
B0826	1988	PtxP1	PtxS1-1	Prn_Region1-2	Prn2	Fim3-1	ptxP1-ptxA1-prn2/3-fim31	V	nd	st3	nd
B0827	1988	PtxP1	PtxS1-1	Prn_Region1-1	Prn1	Fim3-1	ptxP1-ptxA1-prn1-fim31	IV	1	st2	nd
B0828	1988	PtxP1	PtxS1-1	Prn_Region1-3	Prn3	Fim3-1	ptxP1-ptxA1-prn2/3-fim31	V	nd	st3	7	CGCCAGCCCTAGAGCGAGCCCATTTGTACAGGCATGGGCGCACCCGCAGACTGTTGCTCGAGCCTCGGAGTACGCAGGACACCGC
B0829	1988	PtxP1	PtxS1-1	Prn_Region1-1	Prn1	Fim3-1	ptxP1-ptxA1-prn1-fim31	IV	nd	st2	nd
B0830	1988	PtxP1	PtxS1-1	Prn_Region1-1	Prn1	Fim3-1	ptxP1-ptxA1-prn1-fim31	IV	nd	st2	nd
B0832	1988	PtxP1	PtxS1-1	Prn_Region1-1	Prn1	Fim3-1	ptxP1-ptxA1-prn1-fim31	IV	nd	st2	nd
B0833	1988	PtxP1	PtxS1-1	Prn_Region1-1	Prn1	Fim3-1	ptxP1-ptxA1-prn1-fim31	IV	nd	st2	nd
B0834	1988	PtxP1	PtxS1-1	Prn_Region1-1	Prn1	Fim3-1	ptxP1-ptxA1-prn1-fim31	IV	nd	st2	nd
B0835	1988	PtxP1	PtxS1-1	Prn_Region1-1	Prn1	Fim3-1	ptxP1-ptxA1-prn1-fim31	IV	nd	st2	nd
B0836	1988	PtxP1	PtxS1-1	Prn_Region1-2	Prn2	Fim3-1	ptxP1-ptxA1-prn2/3-fim31	V	nd	st2	nd
B0837	1988	PtxP1	PtxS1-1	Prn_Region1-1	Prn1	Fim3-1	ptxP1-ptxA1-prn1-fim31	IV	nd	st2	nd
B2972	1988	PtxP1	PtxS1-1	Prn_Region1-1	Prn1	Fim3-1	ptxP1-ptxA1-prn1-fim31	IV	nd	st3	nd
B2973	1988	PtxP3	PtxS1-1	Prn_Region1-2	Prn2	Fim3-1	ptxP3-ptxA1-prn2/3-fim31	VI	1	st3	16	CGCCAGCCCTAGAGCGAGCCCATTTGTACAGGCATGGGCGCACCCGCAGACTGTTGCTCGAGCCTCGGAGTACGCAGGACACTGC
B2974	1988	PtxP1	PtxS1-1	Prn_Region1-1	Prn1	Fim3-1	ptxP1-ptxA1-prn1-fim31	IV	nd	st2	nd
B0389	1989	PtxP1	PtxS1-1	Prn_Region1-2	Prn2	Fim3-1	ptxP1-ptxA1-prn2/3-fim31	V	nd	st2	28	CGCCGGCCCTAGAGCGAGCCCGTTTGTGCAGGCATGGGCGCACCCGCAGACTATTGCTCGAGCCGCGGGGTACGCAGGGCACCGC
B0838	1989	PtxP1	PtxS1-1	Prn_Region1-2	Prn2	Fim3-1	ptxP1-ptxA1-prn2/3-fim31	V	nd	st2	nd
B0839	1989	PtxP1	PtxS1-1	Prn_Region1-1	Prn1	Fim3-1	ptxP1-ptxA1-prn1-fim31	IV	nd	st3	nd
B0841	1989	PtxP1	PtxS1-1	Prn_Region1-1	Prn1	Fim3-1	ptxP1-ptxA1-prn1-fim31	IV	nd	st3	nd
B0842	1989	PtxP1	PtxS1-1	Prn_Region1-1	Prn1	Fim3-1	ptxP1-ptxA1-prn1-fim31	IV	nd	st2	nd
B0843	1989	PtxP1	PtxS1-1	Prn_Region1-2	Prn2	Fim3-1	ptxP1-ptxA1-prn2/3-fim31	V	nd	st2	nd
B0844	1989	PtxP1	PtxS1-1	Prn_Region1-1	Prn1	Fim3-1	ptxP1-ptxA1-prn1-fim31	IV	nd	st2	nd
B0845	1989	PtxP1	PtxS1-1	Prn_Region1-2	Prn2	Fim3-1	ptxP1-ptxA1-prn2/3-fim31	V	nd	st2	nd
B0846	1989	PtxP1	PtxS1-1	Prn_Region1-1	Prn1	Fim3-1	ptxP1-ptxA1-prn1-fim31	IV	nd	st2	nd
B0848	1989	PtxP1	PtxS1-1	Prn_Region1-3	Prn3	Fim3-1	ptxP1-ptxA1-prn2/3-fim31	V	nd	st3	nd
B0849	1989	PtxP1	PtxS1-1	Prn_Region1-2	Prn2	Fim3-1	ptxP1-ptxA1-prn2/3-fim31	V	nd	st3	nd
B0850	1989	PtxP1	PtxS1-1	Prn_Region1-3	Prn3	Fim3-1	ptxP1-ptxA1-prn2/3-fim31	V	nd	st2	nd
B0853	1989	PtxP1	PtxS1-1	Prn_Region1-3	Prn3	Fim3-1	ptxP1-ptxA1-prn2/3-fim31	V	nd	st3	nd
B0854	1989	PtxP1	PtxS1-1	Prn_Region1-2	Prn2	Fim3-1	ptxP1-ptxA1-prn2/3-fim31	V	nd	st2	nd
B0855	1989	PtxP1	PtxS1-1	Prn_Region1-1	Prn1	Fim3-1	ptxP1-ptxA1-prn1-fim31	IV	nd	st3	nd
B0856	1989	PtxP1	PtxS1-1	Prn_Region1-1	Prn1	Fim3-1	ptxP1-ptxA1-prn1-fim31	IV	nd	st2	nd
B0857	1989	PtxP1	PtxS1-1	Prn_Region1-2	Prn2	Fim3-1	ptxP1-ptxA1-prn2/3-fim31	V	nd	st0	nd
B0858	1989	PtxP1	PtxS1-2	Prn_Region1-1	Prn1	Fim3-1	ptxP1-ptxA2-prn1-fim31	III	nd	st3	nd
B0859	1989	PtxP3	PtxS1-1	Prn_Region1-2	Prn2	Fim3-1	ptxP3-ptxA1-prn2/3-fim31	VI	1	st3	16	CGCCAGCCCTAGAGCGAGCCCATTTGTACAGGCATGGGCGCACCCGCAGACTGTTGCTCGAGCCTCGGAGTACGCAGGACACTGC
B0860	1989	PtxP10	PtxS1-1	Prn_Region1-3	Prn3	Fim3-1	ptxP10-ptxA1-prn2/3-fim31	other	1	st3	nd
B0862	1989	PtxP1	PtxS1-1	Prn_Region1-2	Prn2	Fim3-1	ptxP1-ptxA1-prn2/3-fim31	V	nd	st3	nd
B0863	1989	PtxP1	PtxS1-1	Prn_Region1-3	Prn3	Fim3-1	ptxP1-ptxA1-prn2/3-fim31	V	nd	st3	nd
B0865	1989	PtxP1	PtxS1-1	Prn_Region1-1	Prn1	Fim3-1	ptxP1-ptxA1-prn1-fim31	IV	nd	st3	nd
B2975	1989	PtxP1	PtxS1-2	Prn_Region1-1	Prn1	Fim3-1	ptxP1-ptxA2-prn1-fim31	III	nd	st0	nd
B2976	1989	PtxP1	PtxS1-2	Prn_Region1-1	Prn1	Fim3-1	ptxP1-ptxA2-prn1-fim31	III	nd	st2	nd
B2977	1989	PtxP1	PtxS1-2	Prn_Region1-1	Prn1	Fim3-1	ptxP1-ptxA2-prn1-fim31	III	nd	st2,3	nd
B2978	1989	PtxP1	PtxS1-1	Prn_Region1-1	Prn1	Fim3-1	ptxP1-ptxA1-prn1-fim31	IV	nd	st2	nd
B2979	1989	PtxP1	PtxS1-1	Prn_Region1-3	Prn3	Fim3-1	ptxP1-ptxA1-prn2/3-fim31	V	nd	st3	nd
B0391	1990	PtxP1	PtxS1-1	Prn_Region1-1	Prn1	Fim3-1	ptxP1-ptxA1-prn1-fim31	IV	nd	st2	29	CGCCGGCCCTAGAGCGAGCCCGTTTGTGCAGGCATGGGCGCACCCGCAGACTATTGCTCGAGCCTCGGGGTACGCAGGGCACCGC
B0866	1990	PtxP1	PtxS1-1	Prn_Region1-2	Prn2	Fim3-1	ptxP1-ptxA1-prn2/3-fim31	V	nd	st3	nd
B0868	1990	PtxP1	PtxS1-1	Prn_Region1-3	Prn3	Fim3-1	ptxP1-ptxA1-prn2/3-fim31	V	nd	st3	nd
B0869	1990	PtxP3	PtxS1-1	Prn_Region1-2	Prn2	Fim3-1	ptxP3-ptxA1-prn2/3-fim31	VI	1	st3	nd
B0870	1990	PtxP1	PtxS1-1	Prn_Region1-2	Prn2	Fim3-1	ptxP1-ptxA1-prn2/3-fim31	V	nd	st3	nd
B0872	1990	PtxP3	PtxS1-1	Prn_Region1-2	Prn2	Fim3-1	ptxP3-ptxA1-prn2/3-fim31	VI	1	st3	16	CGCCAGCCCTAGAGCGAGCCCATTTGTACAGGCATGGGCGCACCCGCAGACTGTTGCTCGAGCCTCGGAGTACGCAGGACACTGC
B0873	1990	PtxP1	PtxS1-1	Prn_Region1-2	Prn2	Fim3-1	ptxP1-ptxA1-prn2/3-fim31	V	nd	st3	nd
B0875	1990	PtxP1	PtxS1-1	Prn_Region1-1	Prn1	Fim3-1	ptxP1-ptxA1-prn1-fim31	IV	nd	st3	nd
B0876	1990	PtxP1	PtxS1-1	Prn_Region1-1	Prn1	Fim3-1	ptxP1-ptxA1-prn1-fim31	IV	nd	st3	nd
B0877	1990	PtxP1	PtxS1-1	Prn_Region1-1	Prn1	Fim3-1	ptxP1-ptxA1-prn1-fim31	IV	nd	st3	nd
B0878	1990	PtxP1	PtxS1-1	Prn_Region1-3	Prn3	Fim3-1	ptxP1-ptxA1-prn2/3-fim31	V	nd	st3	nd
B0879	1990	PtxP1	PtxS1-1	Prn_Region1-2	Prn2	Fim3-1	ptxP1-ptxA1-prn2/3-fim31	V	1	st3	nd
B0880	1990	PtxP1	PtxS1-1	Prn_Region1-1	Prn1	Fim3-1	ptxP1-ptxA1-prn1-fim31	IV	nd	st3	nd
B0881	1990	PtxP10	PtxS1-1	Prn_Region1-3	Prn3	Fim3-1	ptxP10-ptxA1-prn2/3-fim31	other	1	st3	nd
B0882	1990	PtxP3	PtxS1-1	Prn_Region1-2	Prn2	Fim3-1	ptxP3-ptxA1-prn2/3-fim31	VI	1	st3	16	CGCCAGCCCTAGAGCGAGCCCATTTGTACAGGCATGGGCGCACCCGCAGACTGTTGCTCGAGCCTCGGAGTACGCAGGACACTGC
B0883	1990	PtxP10	PtxS1-1	Prn_Region1-3	Prn3	Fim3-1	ptxP10-ptxA1-prn2/3-fim31	other	nd	st3	nd
B0884	1990	PtxP3	PtxS1-1	Prn_Region1-2	Prn2	Fim3-1	ptxP3-ptxA1-prn2/3-fim31	VI	nd	st3	17	CGCCAGCCCTAGGGCGAGCCCATTTGTACAAGCGTGGGCGCACCCGCAGACTGTTGTTCGAGCCTCGGAGTACGCAGAACACTGC
B0885	1990	PtxP10	PtxS1-1	Prn_Region1-3	Prn3	Fim3-1	ptxP10-ptxA1-prn2/3-fim31	other	nd	st3	nd
B0886	1990	PtxP1	PtxS1-1	Prn_Region1-1	Prn1	Fim3-1	ptxP1-ptxA1-prn1-fim31	IV	1	st2	6	CGCCAGCCCTAGAGCGAGCCCATTTGTGCAGGCATGGGCGCACCCGCAGACTGTTGCTCGAGCCTCGGAGTACGCAGGACACCGC
B2980	1990	PtxP1	PtxS1-1	Prn_Region1-1	Prn1	Fim3-1	ptxP1-ptxA1-prn1-fim31	IV	nd	st3	nd
B2981	1990	PtxP2	PtxS1-4	Prn_Region1-7	Prn7	Fim3-1	ptxP2-ptxA4-prn7-fim31	II	nd	st2	nd
B2982	1990	PtxP2	PtxS1-4	Prn_Region1-7	Prn7	Fim3-1	ptxP2-ptxA4-prn7-fim31	II	nd	st3	22	CGCCGACCCCGGATCAAACCTGCCCACGTAGGTACGTACGCCCCTATGTACGATTGCCCAGGCTGCAGGGCGCACAGGGTGCCGT
B2983	1990	PtxP1	PtxS1-1	Prn_Region1-2	Prn2	Fim3-1	ptxP1-ptxA1-prn2/3-fim31	V	nd	st2	nd
B2984	1990	PtxP1	PtxS1-1	Prn_Region1-3	Prn3	Fim3-1	ptxP1-ptxA1-prn2/3-fim31	V	nd	st3	nd
B2985	1990	PtxP3	PtxS1-1	Prn_Region1-2	Prn2	Fim3-1	ptxP3-ptxA1-prn2/3-fim31	VI	nd	st3	17	CGCCAGCCCTAGGGCGAGCCCATTTGTACAAGCGTGGGCGCACCCGCAGACTGTTGTTCGAGCCTCGGAGTACGCAGAACACTGC
B0887	1991	PtxP2	PtxS1-4	Prn_Region1-7	Prn7	Fim3-1	ptxP2-ptxA4-prn7-fim31	II	2	st2	21	CGCCGACCCCGGATCAGACCTGCCCACGTAGGTACGTACGCCCCTATGTACGATTGCCCAGGCTGCAGGGCGCACAGGGTGCCGT
B0888	1991	PtxP1	PtxS1-1	Prn_Region1-3	Prn3	Fim3-1	ptxP1-ptxA1-prn2/3-fim31	V	nd	st3	7	CGCCAGCCCTAGAGCGAGCCCATTTGTACAGGCATGGGCGCACCCGCAGACTGTTGCTCGAGCCTCGGAGTACGCAGGACACCGC
B0411	1992	PtxP1	PtxS1-1	Prn_Region1-2	Prn2	Fim3-1	ptxP1-ptxA1-prn2/3-fim31	V	nd	st3	nd
B0889	1992	PtxP1	PtxS1-1	Prn_Region1-3	Prn3	Fim3-1	ptxP1-ptxA1-prn2/3-fim31	V	nd	st3	nd
B0890	1992	PtxP1	PtxS1-1	Prn_Region1-2	Prn2	Fim3-1	ptxP1-ptxA1-prn2/3-fim31	V	nd	st3	nd
B0891	1992	PtxP1	PtxS1-1	Prn_Region1-1	Prn1	Fim3-1	ptxP1-ptxA1-prn1-fim31	IV	1	st3	6	CGCCAGCCCTAGAGCGAGCCCATTTGTGCAGGCATGGGCGCACCCGCAGACTGTTGCTCGAGCCTCGGAGTACGCAGGACACCGC
B0892	1992	PtxP1	PtxS1-1	Prn_Region1-1	Prn1	Fim3-1	ptxP1-ptxA1-prn1-fim31	IV	nd	st3	nd
B0893	1992	PtxP1	PtxS1-1	Prn_Region1-2	Prn2	Fim3-1	ptxP1-ptxA1-prn2/3-fim31	V	nd	st3	nd
B0894	1992	PtxP1	PtxS1-1	Prn_Region1-2	Prn2	Fim3-1	ptxP1-ptxA1-prn2/3-fim31	V	nd	st3	nd
B0895	1992	PtxP1	PtxS1-1	Prn_Region1-2	Prn2	Fim3-1	ptxP1-ptxA1-prn2/3-fim31	V	nd	st3	nd
B0897	1992	PtxP1	PtxS1-1	Prn_Region1-3	Prn3	Fim3-1	ptxP1-ptxA1-prn2/3-fim31	V	nd	st3	nd
B0898	1992	PtxP1	PtxS1-1	Prn_Region1-3	Prn3	Fim3-1	ptxP1-ptxA1-prn2/3-fim31	V	nd	st3	nd
B0899	1992	PtxP1	PtxS1-1	Prn_Region1-2	Prn2	Fim3-1	ptxP1-ptxA1-prn2/3-fim31	V	nd	st3	nd
B0900	1992	PtxP1	PtxS1-1	Prn_Region1-3	Prn3	Fim3-1	ptxP1-ptxA1-prn2/3-fim31	V	nd	st3	nd
B0901	1992	PtxP1	PtxS1-1	Prn_Region1-3	Prn3	Fim3-1	ptxP1-ptxA1-prn2/3-fim31	V	nd	st3	nd
B0902	1992	PtxP1	PtxS1-1	Prn_Region1-2	Prn2	Fim3-1	ptxP1-ptxA1-prn2/3-fim31	V	nd	st2	nd
B0903	1992	PtxP1	PtxS1-1	Prn_Region1-2	Prn2	Fim3-1	ptxP1-ptxA1-prn2/3-fim31	V	nd	st2	nd
B0904	1992	PtxP7	PtxS1-1	Prn_Region1-1	Prn1	Fim3-1	ptxP7-ptxA1-prn1-fim31	other	nd	st3	nd
B2227	1992	PtxP3	PtxS1-1	Prn_Region1-2	Prn2	Fim3-1	ptxP3-ptxA1-prn2/3-fim31	VI	nd	nd	nd
B2989	1992	PtxP1	PtxS1-2	Prn_Region1-1	Prn1	Fim3-1	ptxP1-ptxA2-prn1-fim31	III	nd	st3	nd
B2990	1992	PtxP1	PtxS1-2	Prn_Region1-1	Prn1	Fim3-1	ptxP1-ptxA2-prn1-fim31	III	nd	st3	nd
B2991	1992	PtxP1	PtxS1-2	Prn_Region1-1	Prn1	Fim3-1	ptxP1-ptxA2-prn1-fim31	III	nd	autoagglutinable	nd
B0393	1993	PtxP1	PtxS1-1	Prn_Region1-2	Prn2	Fim3-1	ptxP1-ptxA1-prn2/3-fim31	V	nd	st3	nd
B0394	1993	PtxP3	PtxS1-1	Prn_Region1-2	Prn2	Fim3-1	ptxP3-ptxA1-prn2/3-fim31	VI	1	st3	nd
B0395	1993	PtxP1	PtxS1-1	Prn_Region1-3	Prn3	Fim3-1	ptxP1-ptxA1-prn2/3-fim31	V	1	st3	nd
B0396	1993	PtxP3	PtxS1-1	Prn_Region1-2	Prn2	Fim3-1	ptxP3-ptxA1-prn2/3-fim31	VI	nd	st3	nd
B0398	1993	PtxP1	PtxS1-1	Prn_Region1-2	Prn2	Fim3-1	ptxP1-ptxA1-prn2/3-fim31	V	nd	st3	nd
B0399	1993	PtxP3	PtxS1-1	Prn_Region1-2	Prn2	Fim3-1	ptxP3-ptxA1-prn2/3-fim31	VI	1	st3	nd
B0400	1993	PtxP1	PtxS1-1	Prn_Region1-2	Prn2	Fim3-1	ptxP1-ptxA1-prn2/3-fim31	V	1	st3	8	CGCCAGCCCTAGAGTGAGCCCATTTGTACAGGCATGGCGGCACCCGCAGACTGTTGCTCGAGCCTCGGAGTACGCAGGACACCGC
B0401	1993	PtxP1	PtxS1-1	Prn_Region1-1	Prn1	Fim3-1	ptxP1-ptxA1-prn1-fim31	IV	nd	st3	nd
B0416	1993	PtxP1	PtxS1-1	Prn_Region1-2	Prn2	Fim3-1	ptxP1-ptxA1-prn2/3-fim31	V	nd	st3	nd
B0417	1993	PtxP1	PtxS1-1	Prn_Region1-2	Prn2	Fim3-1	ptxP1-ptxA1-prn2/3-fim31	V	nd	st3	nd
B0543	1993	PtxP1	PtxS1-1	Prn_Region1-3	Prn3	Fim3-1	ptxP1-ptxA1-prn2/3-fim31	V	nd	st3	nd
B0544	1993	PtxP1	PtxS1-1	Prn_Region1-3	Prn3	Fim3-1	ptxP1-ptxA1-prn2/3-fim31	V	1	st3	nd
B0545	1993	PtxP1	PtxS1-1	Prn_Region1-3	Prn3	Fim3-1	ptxP1-ptxA1-prn2/3-fim31	V	nd	st3	nd
B0546	1993	PtxP1	PtxS1-1	Prn_Region1-3	Prn3	Fim3-1	ptxP1-ptxA1-prn2/3-fim31	V	nd	st3	7	CGCCAGCCCTAGAGCGAGCCCATTTGTACAGGCATGGGCGCACCCGCAGACTGTTGCTCGAGCCTCGGAGTACGCAGGACACCGC
B0547	1993	PtxP1	PtxS1-1	Prn_Region1-2	Prn2	Fim3-1	ptxP1-ptxA1-prn2/3-fim31	V	nd	st3	nd
B0548	1993	PtxP3	PtxS1-1	Prn_Region1-2	Prn2	Fim3-1	ptxP3-ptxA1-prn2/3-fim31	VI	nd	st3	16	CGCCAGCCCTAGAGCGAGCCCATTTGTACAGGCATGGGCGCACCCGCAGACTGTTGCTCGAGCCTCGGAGTACGCAGGACACTGC
B0550	1993	PtxP1	PtxS1-1	Prn_Region1-3	Prn3	Fim3-1	ptxP1-ptxA1-prn2/3-fim31	V	nd	st3	nd
B0554	1993	PtxP3	PtxS1-1	Prn_Region1-2	Prn2	Fim3-1	ptxP3-ptxA1-prn2/3-fim31	VI	nd	st3	nd
B0557	1993	PtxP1	PtxS1-1	Prn_Region1-3	Prn3	Fim3-1	ptxP1-ptxA1-prn2/3-fim31	V	nd	st3	nd
B2229	1993	PtxP1	PtxS1-1	Prn_Region1-3	Prn3	Fim3-1	ptxP1-ptxA1-prn2/3-fim31	V	nd	nd	nd
B0345	1994	PtxP3	PtxS1-1	Prn_Region1-2	Prn2	Fim3-1	ptxP3-ptxA1-prn2/3-fim31	VI	1	st3	15	CGCCAGCCCTAGAGCGAGCCCATTTGTACAGGCATGGGCGCACCCGCAGACTGTTGTTCGAGCCTCGGAGTACGCAGGACACTGC
B0350	1994	PtxP1	PtxS1-1	Prn_Region1-3	Prn3	Fim3-1	ptxP1-ptxA1-prn2/3-fim31	V	nd	st3	nd
B0352	1994	PtxP1	PtxS1-1	Prn_Region1-3	Prn3	Fim3-1	ptxP1-ptxA1-prn2/3-fim31	V	nd	st3	nd
B0353	1994	PtxP1	PtxS1-1	Prn_Region1-3	Prn3	Fim3-1	ptxP1-ptxA1-prn2/3-fim31	V	nd	st3	nd
B0355	1994	PtxP1	PtxS1-1	Prn_Region1-3	Prn3	Fim3-1	ptxP1-ptxA1-prn2/3-fim31	V	nd	st3	nd
B0358	1994	PtxP3	PtxS1-1	Prn_Region1-2	Prn2	Fim3-1	ptxP3-ptxA1-prn2/3-fim31	VI	1	st3	nd
B0359	1994	PtxP3	PtxS1-1	Prn_Region1-2	Prn2	Fim3-1	ptxP3-ptxA1-prn2/3-fim31	VI	nd	st3	nd
B0365	1994	PtxP1	PtxS1-1	Prn_Region1-3	Prn3	Fim3-1	ptxP1-ptxA1-prn2/3-fim31	V	nd	st3	nd
B0518	1994	PtxP3	PtxS1-1	Prn_Region1-2	Prn2	Fim3-1	ptxP3-ptxA1-prn2/3-fim31	VI	nd	st3	nd
B0519	1994	PtxP1	PtxS1-1	Prn_Region1-2	Prn2	Fim3-1	ptxP1-ptxA1-prn2/3-fim31	V	nd	st3	nd
B0520	1994	PtxP1	PtxS1-1	Prn_Region1-3	Prn3	Fim3-1	ptxP1-ptxA1-prn2/3-fim31	V	nd	st3	nd
B0522	1994	PtxP3	PtxS1-1	Prn_Region1-2	Prn2	Fim3-1	ptxP3-ptxA1-prn2/3-fim31	VI	nd	st3	nd
B0524	1994	PtxP1	PtxS1-1	Prn_Region1-2	Prn2	Fim3-1	ptxP1-ptxA1-prn2/3-fim31	V	nd	st3	nd
B0526	1994	PtxP1	PtxS1-1	Prn_Region1-2	Prn2	Fim3-1	ptxP1-ptxA1-prn2/3-fim31	V	nd	st3	nd
B0530	1994	PtxP1	PtxS1-1	Prn_Region1-3	Prn3	Fim3-1	ptxP1-ptxA1-prn2/3-fim31	V	nd	st3	7	CGCCAGCCCTAGAGCGAGCCCATTTGTACAGGCATGGGCGCACCCGCAGACTGTTGCTCGAGCCTCGGAGTACGCAGGACACCGC
B0532	1994	PtxP1	PtxS1-2	Prn_Region1-1	Prn1	Fim3-1	ptxP1-ptxA2-prn1-fim31	III	1	st3	nd
B0539	1994	PtxP3	PtxS1-1	Prn_Region1-2	Prn2	Fim3-1	ptxP3-ptxA1-prn2/3-fim31	VI	1	st3	nd
B0540	1994	PtxP1	PtxS1-1	Prn_Region1-3	Prn3	Fim3-1	ptxP1-ptxA1-prn2/3-fim31	V	nd	st2	nd
B0541	1994	PtxP3	PtxS1-1	Prn_Region1-2	Prn2	Fim3-1	ptxP3-ptxA1-prn2/3-fim31	VI	nd	st3	nd
B0542	1994	PtxP1	PtxS1-1	Prn_Region1-1	Prn1	Fim3-1	ptxP1-ptxA1-prn1-fim31	IV	nd	st3	6	CGCCAGCCCTAGAGCGAGCCCATTTGTGCAGGCATGGGCGCACCCGCAGACTGTTGCTCGAGCCTCGGAGTACGCAGGACACCGC
B0596	1995	PtxP3	PtxS1-1	Prn_Region1-2	Prn2	Fim3-1	ptxP3-ptxA1-prn2/3-fim31	VI	1	st3	15	CGCCAGCCCTAGAGCGAGCCCATTTGTACAGGCATGGGCGCACCCGCAGACTGTTGTTCGAGCCTCGGAGTACGCAGGACACTGC
B0597	1995	PtxP1	PtxS1-1	Prn_Region1-3	Prn3	Fim3-1	ptxP1-ptxA1-prn2/3-fim31	V	nd	st3	nd
B0599	1995	PtxP1	PtxS1-1	Prn_Region1-3	Prn3	Fim3-1	ptxP1-ptxA1-prn2/3-fim31	V	nd	st3	nd
B0600	1995	PtxP3	PtxS1-1	Prn_Region1-2	Prn2	Fim3-1	ptxP3-ptxA1-prn2/3-fim31	VI	nd	st3	nd
B0601	1995	PtxP1	PtxS1-1	Prn_Region1-2	Prn2	Fim3-1	ptxP1-ptxA1-prn2/3-fim31	V	nd	st3	7	CGCCAGCCCTAGAGCGAGCCCATTTGTACAGGCATGGGCGCACCCGCAGACTGTTGCTCGAGCCTCGGAGTACGCAGGACACCGC
B0602	1995	PtxP1	PtxS1-1	Prn_Region1-1	Prn1	Fim3-1	ptxP1-ptxA1-prn1-fim31	IV	nd	st3	nd
B0604	1995	PtxP1	PtxS1-1	Prn_Region1-3	Prn3	Fim3-1	ptxP1-ptxA1-prn2/3-fim31	V	nd	st3	nd
B0606	1995	PtxP3	PtxS1-1	Prn_Region1-2	Prn2	Fim3-1	ptxP3-ptxA1-prn2/3-fim31	VI	nd	st3	nd
B0607	1995	PtxP3	PtxS1-1	Prn_Region1-2	Prn2	Fim3-1	ptxP3-ptxA1-prn2/3-fim31	VI	1	st3	nd
B0608	1995	PtxP3	PtxS1-1	Prn_Region1-2	Prn2	Fim3-1	ptxP3-ptxA1-prn2/3-fim31	VI	nd	st3	nd
B0609	1995	PtxP3	PtxS1-1	Prn_Region1-2	Prn2	Fim3-1	ptxP3-ptxA1-prn2/3-fim31	VI	1	st3	15	CGCCAGCCCTAGAGCGAGCCCATTTGTACAGGCATGGGCGCACCCGCAGACTGTTGTTCGAGCCTCGGAGTACGCAGGACACTGC
B0610	1995	PtxP1	PtxS1-1	Prn_Region1-2	Prn2	Fim3-1	ptxP1-ptxA1-prn2/3-fim31	V	nd	st3	nd
B0611	1995	PtxP1	PtxS1-1	Prn_Region1-3	Prn3	Fim3-1	ptxP1-ptxA1-prn2/3-fim31	V	nd	st3	nd
B0612	1995	PtxP1	PtxS1-1	Prn_Region1-3	Prn3	Fim3-1	ptxP1-ptxA1-prn2/3-fim31	V	nd	st3	nd
B0613	1995	PtxP3	PtxS1-1	Prn_Region1-2	Prn2	Fim3-1	ptxP3-ptxA1-prn2/3-fim31	VI	nd	st3	10	CGCCAGCCCTAGGGCGAGCCCATTTGTACAGGCATGGGCGCACCCGCAGACTGTTGTTCGAGCCTCGGAGTACGCAGGACACTGC
B0638	1996	PtxP1	PtxS1-1	Prn_Region1-3	Prn3	Fim3-1	ptxP1-ptxA1-prn2/3-fim31	V	1	st3	7	CGCCAGCCCTAGAGCGAGCCCATTTGTACAGGCATGGGCGCACCCGCAGACTGTTGCTCGAGCCTCGGAGTACGCAGGACACCGC
B0640	1996	PtxP1	PtxS1-1	Prn_Region1-1	Prn1	Fim3-1	ptxP1-ptxA1-prn1-fim31	IV	nd	st3	nd
B0644	1996	PtxP3	PtxS1-1	Prn_Region1-2	Prn2	Fim3-1	ptxP3-ptxA1-prn2/3-fim31	VI	nd	st3	16	CGCCAGCCCTAGAGCGAGCCCATTTGTACAGGCATGGGCGCACCCGCAGACTGTTGCTCGAGCCTCGGAGTACGCAGGACACTGC
B0649	1996	PtxP3	PtxS1-1	Prn_Region1-3	Prn3	Fim3-1	ptxP3-ptxA1-prn2/3-fim31	VI	nd	st3	nd
B0650	1996	PtxP1	PtxS1-1	Prn_Region1-3	Prn3	Fim3-1	ptxP1-ptxA1-prn2/3-fim31	V	1	st2	nd
B0652	1996	PtxP1	PtxS1-1	Prn_Region1-2	Prn2	Fim3-1	ptxP1-ptxA1-prn2/3-fim31	V	nd	st3	8	CGCCAGCCCTAGAGTGAGCCCATTTGTACAGGCATGGGCGCACCCGCAGACTGTTGCTCGAGCCTCGGAGTACGCAGGACACCGC
B0654	1996	PtxP1	PtxS1-1	Prn_Region1-3	Prn3	Fim3-1	ptxP1-ptxA1-prn2/3-fim31	V	1	st3	nd
B0660	1996	PtxP1	PtxS1-1	Prn_Region1-3	Prn3	Fim3-1	ptxP1-ptxA1-prn2/3-fim31	V	nd	st2	nd
B0771	1996	PtxP3	PtxS1-1	Prn_Region1-3	Prn3	Fim3-1	ptxP3-ptxA1-prn2/3-fim31	VI	1	st3	11	CGCCAGCCCTAGGGCGAGCCCATTTGTACAAGCGTGGGCGCACCCGCAGGCTGTTGTTCGAGCCTCGGAGTACGCAGAACACTGC
B0776	1996	PtxP1	PtxS1-2	Prn_Region1-1	Prn1	Fim3-1	ptxP1-ptxA2-prn1-fim31	III	nd	st3	nd
B0777	1996	PtxP1	PtxS1-1	Prn_Region1-2	Prn2	Fim3-1	ptxP1-ptxA1-prn2/3-fim31	V	1	st3	nd
B0779	1996	PtxP1	PtxS1-1	Prn_Region1-2	Prn2	Fim3-1	ptxP1-ptxA1-prn2/3-fim31	V	nd	st3	nd
B0782	1996	PtxP1	PtxS1-1	Prn_Region1-1	Prn1	Fim3-4	ptxP1-ptxA1-prn1-fim34	other	nd	st3	nd
B0783	1996	PtxP3	PtxS1-1	Prn_Region1-2	Prn2	Fim3-2	ptxP3-ptxA1-prn2/3-fim32	VII	nd	st3	nd
B0785	1996	PtxP1	PtxS1-1	Prn_Region1-3	Prn3	Fim3-1	ptxP1-ptxA1-prn2/3-fim31	V	nd	st3	nd
B0792	1996	PtxP3	PtxS1-1	Prn_Region1-1	Prn1	Fim3-1	ptxP3-ptxA1-prn1-fim31	other	1	st3	11	CGCCAGCCCTAGGGCGAGCCCATTTGTACAAGCGTGGGCGCACCCGCAGGCTGTTGTTCGAGCCTCGGAGTACGCAGAACACTGC
B0939	1996	PtxP1	PtxS1-1	Prn_Region1-3	Prn3	Fim3-1	ptxP1-ptxA1-prn2/3-fim31	V	nd	st3	nd
B0940	1996	PtxP1	PtxS1-1	Prn_Region1-3	Prn3	Fim3-1	ptxP1-ptxA1-prn2/3-fim31	V	nd	st3	7	CGCCAGCCCTAGAGCGAGCCCATTTGTACAGGCATGGGCGCACCCGCAGACTGTTGCTCGAGCCTCGGAGTACGCAGGACACCGC
B0943	1996	PtxP1	PtxS1-1	Prn_Region1-3	Prn3	Fim3-1	ptxP1-ptxA1-prn2/3-fim31	V	nd	st3	nd
B0949	1996	PtxP3	PtxS1-1	Prn_Region1-3	Prn3	Fim3-2	ptxP3-ptxA1-prn2/3-fim32	VII	nd	st3	12	CGCCAGCCCTAGGGCGAGCCCATTTGTACAAGCGTGGGCGCACCCGCAGGCTGTCGTTCGAGCCTCGGAGTACGCAGAACACTGC
B1667	1997	PtxP1	PtxS1-1	Prn_Region1-3	Prn3	Fim3-1	ptxP1-ptxA1-prn2/3-fim31	V	1	st3	nd
B1668	1997	PtxP1	PtxS1-1	Prn_Region1-3	Prn3	Fim3-1	ptxP1-ptxA1-prn2/3-fim31	V	1	st3	nd
B1714	1997	PtxP1	PtxS1-1	Prn_Region1-3	Prn3	Fim3-1	ptxP1-ptxA1-prn2/3-fim31	V	nd	st3	nd
B1717	1997	PtxP3	PtxS1-1	Prn_Region1-2	Prn2	Fim3-1	ptxP3-ptxA1-prn2/3-fim31	VI	nd	st3	nd
B1719	1997	PtxP1	PtxS1-1	Prn_Region1-3	Prn3	Fim3-1	ptxP1-ptxA1-prn2/3-fim31	V	nd	st3	7	CGCCAGCCCTAGAGCGAGCCCATTTGTACAGGCATGGGCGCACCCGCAGACTGTTGCTCGAGCCTCGGAGTACGCAGGACACCGC
B1720	1997	PtxP3	PtxS1-1	Prn_Region1-2	Prn2	Fim3-1	ptxP3-ptxA1-prn2/3-fim31	VI	nd	st3	nd
B1722	1997	PtxP1	PtxS1-1	Prn_Region1-1	Prn1	Fim3-1	ptxP1-ptxA1-prn1-fim31	IV	nd	st2	nd
B1725	1997	PtxP1	PtxS1-1	Prn_Region1-2	Prn2	Fim3-1	ptxP1-ptxA1-prn2/3-fim31	V	nd	st3	nd
B1764	1997	PtxP1	PtxS1-2	Prn_Region1-1	Prn1	Fim3-1	ptxP1-ptxA2-prn1-fim31	III	nd	st3	nd
B1765	1997	PtxP1	PtxS1-1	Prn_Region1-2	Prn2	Fim3-1	ptxP1-ptxA1-prn2/3-fim31	V	nd	st3	nd
B1766	1997	PtxP1	PtxS1-1	Prn_Region1-3	Prn3	Fim3-1	ptxP1-ptxA1-prn2/3-fim31	V	1	st3	7	CGCCAGCCCTAGAGCGAGCCCATTTGTACAGGCATGGGCGCACCCGCAGACTGTTGCTCGAGCCTCGGAGTACGCAGGACACCGC
B1768	1997	PtxP1	PtxS1-1	Prn_Region1-2	Prn2	Fim3-1	ptxP1-ptxA1-prn2/3-fim31	V	nd	st2	nd
B1770	1997	PtxP3	PtxS1-1	Prn_Region1-2	Prn2	Fim3-2	ptxP3-ptxA1-prn2/3-fim32	VII	1	st3	nd
B1774	1997	PtxP1	PtxS1-1	Prn_Region1-3	Prn3	Fim3-1	ptxP1-ptxA1-prn2/3-fim31	V	nd	st3	nd
B1778	1997	PtxP3	PtxS1-1	Prn_Region1-1	Prn1	Fim3-1	ptxP3-ptxA1-prn1-fim31	other	nd	st3	nd
B1781	1997	PtxP3	PtxS1-1	Prn_Region1-2	Prn2	Fim3-1	ptxP3-ptxA1-prn2/3-fim31	VI	nd	st3	nd
B1783	1997	PtxP1	PtxS1-1	Prn_Region1-1	Prn1	Fim3-4	ptxP1-ptxA1-prn1-fim34	other	nd	st3	nd
B1784	1997	PtxP1	PtxS1-1	Prn_Region1-2	Prn2	Fim3-1	ptxP1-ptxA1-prn2/3-fim31	V	1	st2	nd
B1787	1997	PtxP3	PtxS1-1	Prn_Region1-2	Prn2	Fim3-1	ptxP3-ptxA1-prn2/3-fim31	VI	1	st3	17	CGCCAGCCCTAGGGCGAGCCCATTTGTACAAGCGTGGGCGCACCCGCAGACTGTTGTTCGAGCCTCGGAGTACGCAGAACACTGC
B2005	1997	PtxP11	PtxS1-1	Prn_Region1-2	Prn2	Fim3-1	ptxP11-ptxA1-prn2/3-fim31	other	nd	st3	nd
B1408	1998	PtxP3	PtxS1-1	Prn_Region1-2	Prn2	Fim3-2	ptxP3-ptxA1-prn2/3-fim32	VII	1	st3	12	CGCCAGCCCTAGGGCGAGCCCATTTGTACAAGCGTGGGCGCACCCGCAGGCTGTCGTTCGAGCCTCGGAGTACGCAGAACACTGC
B1409	1998	PtxP1	PtxS1-1	Prn_Region1-2	Prn2	Fim3-1	ptxP1-ptxA1-prn2/3-fim31	V	nd	st2	nd
B1410	1998	PtxP3	PtxS1-1	Prn_Region1-2	Prn2	Fim3-1	ptxP3-ptxA1-prn2/3-fim31	VI	nd	st3	nd
B1411	1998	PtxP3	PtxS1-1	Prn_Region1-2	Prn2	Fim3-2	ptxP3-ptxA1-prn2/3-fim32	VII	nd	st3	nd
B1701	1998	PtxP1	PtxS1-1	Prn_Region1-2	Prn2	Fim3-1	ptxP1-ptxA1-prn2/3-fim31	V	nd	st2	nd
B1702	1998	PtxP1	PtxS1-1	Prn_Region1-3	Prn3	Fim3-1	ptxP1-ptxA1-prn2/3-fim31	V	nd	st2	nd
B1703	1998	PtxP3	PtxS1-1	Prn_Region1-2	Prn2	Fim3-1	ptxP3-ptxA1-prn2/3-fim31	VI	nd	st3	nd
B1704	1998	PtxP3	PtxS1-1	Prn_Region1-2	Prn2	Fim3-2	ptxP3-ptxA1-prn2/3-fim32	VII	nd	st3	nd
B1707	1998	PtxP3	PtxS1-1	Prn_Region1-2	Prn2	Fim3-1	ptxP3-ptxA1-prn2/3-fim31	VI	nd	st3	nd
B1708	1998	PtxP1	PtxS1-1	Prn_Region1-2	Prn2	Fim3-1	ptxP1-ptxA1-prn2/3-fim31	V	nd	st2	nd
B1709	1998	PtxP3	PtxS1-1	Prn_Region1-2	Prn2	Fim3-1	ptxP3-ptxA1-prn2/3-fim31	VI	nd	st3	nd
B1710	1998	PtxP3	PtxS1-1	Prn_Region1-2	Prn2	Fim3-2	ptxP3-ptxA1-prn2/3-fim32	VII	nd	st3	nd
B1711	1998	PtxP3	PtxS1-1	Prn_Region1-2	Prn2	Fim3-2	ptxP3-ptxA1-prn2/3-fim32	VII	nd	st3	nd
B1805	1998	PtxP3	PtxS1-1	Prn_Region1-2	Prn2	Fim3-1	ptxP3-ptxA1-prn2/3-fim31	VI	nd	st3	nd
B1807	1998	PtxP1	PtxS1-1	Prn_Region1-2	Prn2	Fim3-1	ptxP1-ptxA1-prn2/3-fim31	V	nd	st2	7	CGCCAGCCCTAGAGCGAGCCCATTTGTACAGGCATGGGCGCACCCGCAGACTGTTGCTCGAGCCTCGGAGTACGCAGGACACCGC
B1945	1998	PtxP1	PtxS1-1	Prn_Region1-3	Prn3	Fim3-1	ptxP1-ptxA1-prn2/3-fim31	V	1	st2	nd
B1947	1998	PtxP1	PtxS1-1	Prn_Region1-2	Prn2	Fim3-1	ptxP1-ptxA1-prn2/3-fim31	V	nd	st2	nd
B1953	1998	PtxP1	PtxS1-1	Prn_Region1-2	Prn2	Fim3-1	ptxP1-ptxA1-prn2/3-fim31	V	nd	st2	7	CGCCAGCCCTAGAGCGAGCCCATTTGTACAGGCATGGGCGCACCCGCAGACTGTTGCTCGAGCCTCGGAGTACGCAGGACACCGC
B2013	1998	PtxP1	PtxS1-1	Prn_Region1-2	Prn2	Fim3-1	ptxP1-ptxA1-prn2/3-fim31	V	nd	st2	nd
B2206	1998	PtxP1	PtxS1-1	Prn_Region1-2	Prn2	Fim3-1	ptxP1-ptxA1-prn2/3-fim31	V	nd	st2	nd
B1690	1999	PtxP3	PtxS1-1	Prn_Region1-2	Prn2	Fim3-2	ptxP3-ptxA1-prn2/3-fim32	VII	nd	st3	nd
B1691	1999	PtxP3	PtxS1-1	Prn_Region1-2	Prn2	Fim3-1	ptxP3-ptxA1-prn2/3-fim31	VI	nd	st3	nd
B1692	1999	PtxP3	PtxS1-1	Prn_Region1-2	Prn2	Fim3-1	ptxP3-ptxA1-prn2/3-fim31	VI	nd	st3	nd
B1693	1999	PtxP3	PtxS1-1	Prn_Region1-2	Prn2	Fim3-1	ptxP3-ptxA1-prn2/3-fim31	VI	nd	st3	nd
B1694	1999	PtxP3	PtxS1-1	Prn_Region1-3	Prn3	Fim3-1	ptxP3-ptxA1-prn2/3-fim31	VI	nd	st3	nd
B1695	1999	PtxP1	PtxS1-1	Prn_Region1-2	Prn2	Fim3-1	ptxP1-ptxA1-prn2/3-fim31	V	nd	st2	nd
B1700	1999	PtxP3	PtxS1-1	Prn_Region1-2	Prn2	Fim3-1	ptxP3-ptxA1-prn2/3-fim31	VI	nd	st3	nd
B1706	1999	PtxP3	PtxS1-1	Prn_Region1-2	Prn2	Fim3-1	ptxP3-ptxA1-prn2/3-fim31	VI	1	st3	11	CGCCAGCCCTAGGGCGAGCCCATTTGTACAAGCGTGGGCGCACCCGCAGGCTGTTGTTCGAGCCTCGGAGTACGCAGAACACTGC
B1817	1999	PtxP3	PtxS1-1	Prn_Region1-2	Prn2	Fim3-1	ptxP3-ptxA1-prn2/3-fim31	VI	nd	st3	nd
B1819	1999	PtxP1	PtxS1-1	Prn_Region1-2	Prn2	Fim3-1	ptxP1-ptxA1-prn2/3-fim31	V	1	st2	7	CGCCAGCCCTAGAGCGAGCCCATTTGTACAGGCATGGGCGCACCCGCAGACTGTTGCTCGAGCCTCGGAGTACGCAGGACACCGC
B1825	1999	PtxP1	PtxS1-1	Prn_Region1-2	Prn2	Fim3-1	ptxP1-ptxA1-prn2/3-fim31	V	nd	st3	nd
B1826	1999	PtxP1	PtxS1-1	Prn_Region1-2	Prn2	Fim3-1	ptxP1-ptxA1-prn2/3-fim31	V	nd	st2	7	CGCCAGCCCTAGAGCGAGCCCATTTGTACAGGCATGGGCGCACCCGCAGACTGTTGCTCGAGCCTCGGAGTACGCAGGACACCGC
B1831	1999	PtxP3	PtxS1-1	Prn_Region1-2	Prn2	Fim3-2	ptxP3-ptxA1-prn2/3-fim32	VII	1	st3	14	CGCCAGCACTAGGGCGAGCCCATTTGTACAAGCGTGGGCGCACCCGCAGGCTGTCGTTCGAGCCTAGGAGTACGCAGAACACTGC
B1834	1999	PtxP1	PtxS1-1	Prn_Region1-2	Prn2	Fim3-1	ptxP1-ptxA1-prn2/3-fim31	V	1	st3	33	CGATAGCCCTAAAGTGAGCTCATTTGTACAGGCATAGGCGCACCCGCAGACTGTTGCTTGAGCCTCGAAATACGCAAGACACCGC
B1836	1999	PtxP3	PtxS1-1	Prn_Region1-2	Prn2	Fim3-1	ptxP3-ptxA1-prn2/3-fim31	VI	nd	st3	nd
B1838	1999	PtxP3	PtxS1-1	Prn_Region1-2	Prn2	Fim3-2	ptxP3-ptxA1-prn2/3-fim32	VII	1	st3	12	CGCCAGCCCTAGGGCGAGCCCATTTGTACAAGCGTGGGCGCACCCGCAGGCTGTCGTTCGAGCCTCGGAGTACGCAGAACACTGC
B1841	1999	PtxP1	PtxS1-1	Prn_Region1-3	Prn3	Fim3-1	ptxP1-ptxA1-prn2/3-fim31	V	nd	st3	7	CGCCAGCCCTAGAGCGAGCCCATTTGTACAGGCATGGGCGCACCCGCAGACTGTTGCTCGAGCCTCGGAGTACGCAGGACACCGC
B1843	1999	PtxP1	PtxS1-1	Prn_Region1-2	Prn2	Fim3-1	ptxP1-ptxA1-prn2/3-fim31	V	nd	st3	nd
B1889	1999	PtxP1	PtxS1-1	Prn_Region1-2	Prn2	Fim3-1	ptxP1-ptxA1-prn2/3-fim31	V	nd	st2	nd
B2016	1999	PtxP1	PtxS1-1	Prn_Region1-2	Prn2	Fim3-1	ptxP1-ptxA1-prn2/3-fim31	V	nd	st2	nd
B1861	2000	PtxP3	PtxS1-1	Prn_Region1-2	Prn2	Fim3-2	ptxP3-ptxA1-prn2/3-fim32	VII	nd	st3	nd
B1863	2000	PtxP3	PtxS1-1	Prn_Region1-2	Prn2	Fim3-1	ptxP3-ptxA1-prn2/3-fim31	VI	1	st3	10	CGCCAGCCCTAGGGCGAGCCCATTTGTACAGGCATGGGCGCACCCGCAGACTGTTGTTCGAGCCTCGGAGTACGCAGGACACTGC
B1865	2000	PtxP3	PtxS1-1	Prn_Region1-2	Prn2	Fim3-2	ptxP3-ptxA1-prn2/3-fim32	VII	1	st3	nd
B1868	2000	PtxP1	PtxS1-1	Prn_Region1-2	Prn2	Fim3-1	ptxP1-ptxA1-prn2/3-fim31	V	nd	st3	7	CGCCAGCCCTAGAGCGAGCCCATTTGTACAGGCATGGGCGCACCCGCAGACTGTTGCTCGAGCCTCGGAGTACGCAGGACACCGC
B1873	2000	PtxP3	PtxS1-1	Prn_Region1-2	Prn2	Fim3-1	ptxP3-ptxA1-prn2/3-fim31	VI	nd	st2	11	CGCCAGCCCTAGGGCGAGCCCATTTGTACAAGCGTGGGCGCACCCGCAGGCTGTTGTTCGAGCCTCGGAGTACGCAGAACACTGC
B1874	2000	PtxP3	PtxS1-1	Prn_Region1-2	Prn2	Fim3-2	ptxP3-ptxA1-prn2/3-fim32	VII	nd	st3	nd
B1875	2000	PtxP1	PtxS1-1	Prn_Region1-3	Prn3	Fim3-1	ptxP1-ptxA1-prn2/3-fim31	V	nd	st3	nd
B1878	2000	PtxP1	PtxS1-1	Prn_Region1-2	Prn2	Fim3-1	ptxP1-ptxA1-prn2/3-fim31	V	1	st2	7	CGCCAGCCCTAGAGCGAGCCCATTTGTACAGGCATGGGCGCACCCGCAGACTGTTGCTCGAGCCTCGGAGTACGCAGGACACCGC
B1894	2000	PtxP3	PtxS1-1	Prn_Region1-2	Prn2	Fim3-1	ptxP3-ptxA1-prn2/3-fim31	VI	nd	st3	nd
B1900	2000	PtxP3	PtxS1-1	Prn_Region1-2	Prn2	Fim3-2	ptxP3-ptxA1-prn2/3-fim32	VII	1	st3	12	CGCCAGCCCTAGGGCGAGCCCATTTGTACAAGCGTGGGCGCACCCGCAGGCTGTCGTTCGAGCCTCGGAGTACGCAGAACACTGC
B1901	2000	PtxP3	PtxS1-1	Prn_Region1-2	Prn2	Fim3-1	ptxP3-ptxA1-prn2/3-fim31	VI	nd	st3	nd
B1915	2000	PtxP3	PtxS1-1	Prn_Region1-2	Prn2	Fim3-1	ptxP3-ptxA1-prn2/3-fim31	VI	nd	st3	nd
B1917	2000	PtxP3	PtxS1-1	Prn_Region1-2	Prn2	Fim3-2	ptxP3-ptxA1-prn2/3-fim32	VII	1	st3	13	CGCCAGCCCTAGGGCGAGCCCATTTGTACAAGCGTGGGCGCACCCGCAGGCTGTCGTTCGAGCCTCGGAGTATGCAGAACACTGC
B1920	2000	PtxP1	PtxS1-1	Prn_Region1-2	Prn2	Fim3-1	ptxP1-ptxA1-prn2/3-fim31	V	1	st3	34	CGATAGCCCTAAAGTGAGCCCATTTGTACAGGCATGGGCACACCCGCAGATTGTTGCTCGAGCCTCGAAATACGCGAGACACCGC
B1929	2000	PtxP3	PtxS1-1	Prn_Region1-2	Prn2	Fim3-2	ptxP3-ptxA1-prn2/3-fim32	VII	nd	st3	nd
B2026	2001	PtxP3	PtxS1-1	Prn_Region1-2	Prn2	Fim3-1	ptxP3-ptxA1-prn2/3-fim31	VI	1	st3	11	CGCCAGCCCTAGGGCGAGCCCATTTGTACAAGCGTGGGCGCACCCGCAGGCTGTTGTTCGAGCCTCGGAGTACGCAGAACACTGC
B2027	2001	PtxP3	PtxS1-1	Prn_Region1-2	Prn2	Fim3-2	ptxP3-ptxA1-prn2/3-fim32	VII	1	st3	nd
B2028	2001	PtxP3	PtxS1-1	Prn_Region1-2	Prn2	Fim3-2	ptxP3-ptxA1-prn2/3-fim32	VII	1	st3	12	CGCCAGCCCTAGGGCGAGCCCATTTGTACAAGCGTGGGCGCACCCGCAGGCTGTCGTTCGAGCCTCGGAGTACGCAGAACACTGC
B2029	2001	PtxP3	PtxS1-1	Prn_Region1-2	Prn2	Fim3-2	ptxP3-ptxA1-prn2/3-fim32	VII	nd	st3	12	CGCCAGCCCTAGGGCGAGCCCATTTGTACAAGCGTGGGCGCACCCGCAGGCTGTCGTTCGAGCCTCGGAGTACGCAGAACACTGC
B2030	2001	PtxP3	PtxS1-1	Prn_Region1-2	Prn2	Fim3-2	ptxP3-ptxA1-prn2/3-fim32	VII	1	st3	12	CGCCAGCCCTAGGGCGAGCCCATTTGTACAAGCGTGGGCGCACCCGCAGGCTGTCGTTCGAGCCTCGGAGTACGCAGAACACTGC
B2031	2001	PtxP3	PtxS1-1	Prn_Region1-2	Prn2	Fim3-1	ptxP3-ptxA1-prn2/3-fim31	VI	nd	st3	11	CGCCAGCCCTAGGGCGAGCCCATTTGTACAAGCGTGGGCGCACCCGCAGGCTGTTGTTCGAGCCTCGGAGTACGCAGAACACTGC
B2032	2001	PtxP3	PtxS1-1	Prn_Region1-2	Prn2	Fim3-1	ptxP3-ptxA1-prn2/3-fim31	VI	nd	st3	11	CGCCAGCCCTAGGGCGAGCCCATTTGTACAAGCGTGGGCGCACCCGCAGGCTGTTGTTCGAGCCTCGGAGTACGCAGAACACTGC
B2033	2001	PtxP3	PtxS1-1	Prn_Region1-2	Prn2	Fim3-2	ptxP3-ptxA1-prn2/3-fim32	VII	nd	st3	12	CGCCAGCCCTAGGGCGAGCCCATTTGTACAAGCGTGGGCGCACCCGCAGGCTGTCGTTCGAGCCTCGGAGTACGCAGAACACTGC
B2034	2001	PtxP3	PtxS1-1	Prn_Region1-2	Prn2	Fim3-1	ptxP3-ptxA1-prn2/3-fim31	VI	1	st3	11	CGCCAGCCCTAGGGCGAGCCCATTTGTACAAGCGTGGGCGCACCCGCAGGCTGTTGTTCGAGCCTCGGAGTACGCAGAACACTGC
B2035	2001	PtxP3	PtxS1-1	Prn_Region1-2	Prn2	Fim3-2	ptxP3-ptxA1-prn2/3-fim32	VII	1	st3	12	CGCCAGCCCTAGGGCGAGCCCATTTGTACAAGCGTGGGCGCACCCGCAGGCTGTCGTTCGAGCCTCGGAGTACGCAGAACACTGC
B2037	2001	PtxP3	PtxS1-1	Prn_Region1-2	Prn2	Fim3-2	ptxP3-ptxA1-prn2/3-fim32	VII	nd	st3	12	CGCCAGCCCTAGGGCGAGCCCATTTGTACAAGCGTGGGCGCACCCGCAGGCTGTCGTTCGAGCCTCGGAGTACGCAGAACACTGC
B2039	2001	PtxP3	PtxS1-1	Prn_Region1-2	Prn2	Fim3-1	ptxP3-ptxA1-prn2/3-fim31	VI	1	st3	11	CGCCAGCCCTAGGGCGAGCCCATTTGTACAAGCGTGGGCGCACCCGCAGGCTGTTGTTCGAGCCTCGGAGTACGCAGAACACTGC
B2040	2001	PtxP3	PtxS1-1	Prn_Region1-2	Prn2	Fim3-2	ptxP3-ptxA1-prn2/3-fim32	VII	1	st3	12	CGCCAGCCCTAGGGCGAGCCCATTTGTACAAGCGTGGGCGCACCCGCAGGCTGTCGTTCGAGCCTCGGAGTACGCAGAACACTGC
B2043	2001	PtxP1	PtxS1-1	Prn_Region1-2	Prn2	Fim3-1	ptxP1-ptxA1-prn2/3-fim31	V	nd	st2	nd
B2044	2001	PtxP3	PtxS1-1	Prn_Region1-2	Prn2	Fim3-2	ptxP3-ptxA1-prn2/3-fim32	VII	nd	st3	12	CGCCAGCCCTAGGGCGAGCCCATTTGTACAAGCGTGGGCGCACCCGCAGGCTGTCGTTCGAGCCTCGGAGTACGCAGAACACTGC
B2046	2001	PtxP1	PtxS1-1	Prn_Region1-1	Prn1	Fim3-1	ptxP1-ptxA1-prn1-fim31	IV	nd	st3	nd
B2047	2001	PtxP1	PtxS1-1	Prn_Region1-2	Prn2	Fim3-1	ptxP1-ptxA1-prn2/3-fim31	V	nd	st2	nd
B2049	2001	PtxP3	PtxS1-1	Prn_Region1-2	Prn2	Fim3-2	ptxP3-ptxA1-prn2/3-fim32	VII	nd	st3	12	CGCCAGCCCTAGGGCGAGCCCATTTGTACAAGCGTGGGCGCACCCGCAGGCTGTCGTTCGAGCCTCGGAGTACGCAGAACACTGC
B2052	2001	PtxP1	PtxS1-1	Prn_Region1-2	Prn2	Fim3-1	ptxP1-ptxA1-prn2/3-fim31	V	nd	st2	7	CGCCAGCCCTAGAGCGAGCCCATTTGTACAGGCATGGGCGCACCCGCAGACTGTTGCTCGAGCCTCGGAGTACGCAGGACACCGC
B2054	2001	PtxP3	PtxS1-1	Prn_Region1-2	Prn2	Fim3-2	ptxP3-ptxA1-prn2/3-fim32	VII	nd	st2	12	CGCCAGCCCTAGGGCGAGCCCATTTGTACAAGCGTGGGCGCACCCGCAGGCTGTCGTTCGAGCCTCGGAGTACGCAGAACACTGC
B2057	2001	PtxP3	PtxS1-1	Prn_Region1-2	Prn2	Fim3-2	ptxP3-ptxA1-prn2/3-fim32	VII	nd	st3	12	CGCCAGCCCTAGGGCGAGCCCATTTGTACAAGCGTGGGCGCACCCGCAGGCTGTCGTTCGAGCCTCGGAGTACGCAGAACACTGC
B2063	2001	PtxP3	PtxS1-1	Prn_Region1-2	Prn2	Fim3-1	ptxP3-ptxA1-prn2/3-fim31	VI	nd	st3	11	CGCCAGCCCTAGGGCGAGCCCATTTGTACAAGCGTGGGCGCACCCGCAGGCTGTTGTTCGAGCCTCGGAGTACGCAGAACACTGC
B2383	2002	PtxP1	PtxS1-1	Prn_Region1-3	Prn3	Fim3-1	ptxP1-ptxA1-prn2/3-fim31	V	nd	st3	nd
B2384	2002	PtxP3	PtxS1-1	Prn_Region1-2	Prn2	Fim3-1	ptxP3-ptxA1-prn2/3-fim31	VI	1	st3	11	CGCCAGCCCTAGGGCGAGCCCATTTGTACAAGCGTGGGCGCACCCGCAGGCTGTTGTTCGAGCCTCGGAGTACGCAGAACACTGC
B2385	2002	PtxP3	PtxS1-1	Prn_Region1-2	Prn2	Fim3-2	ptxP3-ptxA1-prn2/3-fim32	VII	nd	st3	nd
B2386	2002	PtxP3	PtxS1-1	Prn_Region1-2	Prn2	Fim3-2	ptxP3-ptxA1-prn2/3-fim32	VII	nd	st3	nd
B2387	2002	PtxP3	PtxS1-1	Prn_Region1-2	Prn2	Fim3-2	ptxP3-ptxA1-prn2/3-fim32	VII	nd	st3	nd
B2388	2002	PtxP3	PtxS1-1	Prn_Region1-2	Prn2	Fim3-2	ptxP3-ptxA1-prn2/3-fim32	VII	nd	st3	nd
B2389	2002	PtxP3	PtxS1-1	Prn_Region1-2	Prn2	Fim3-2	ptxP3-ptxA1-prn2/3-fim32	VII	nd	st3	nd
B2390	2002	PtxP3	PtxS1-1	Prn_Region1-2	Prn2	Fim3-2	ptxP3-ptxA1-prn2/3-fim32	VII	1	st3	nd
B2391	2002	PtxP3	PtxS1-1	Prn_Region1-2	Prn2	Fim3-2	ptxP3-ptxA1-prn2/3-fim32	VII	nd	st3	nd
B2392	2002	PtxP3	PtxS1-1	Prn_Region1-2	Prn2	Fim3-2	ptxP3-ptxA1-prn2/3-fim32	VII	nd	st3	nd
B2393	2002	PtxP3	PtxS1-1	Prn_Region1-2	Prn2	Fim3-2	ptxP3-ptxA1-prn2/3-fim32	VII	nd	st3	nd
B2394	2002	PtxP3	PtxS1-1	Prn_Region1-2	Prn2	Fim3-1	ptxP3-ptxA1-prn2/3-fim31	VI	nd	st3	nd
B2395	2002	PtxP3	PtxS1-1	Prn_Region1-2	Prn2	Fim3-1	ptxP3-ptxA1-prn2/3-fim31	VI	nd	st3	nd
B2396	2002	PtxP3	PtxS1-1	Prn_Region1-2	Prn2	Fim3-1	ptxP3-ptxA1-prn2/3-fim31	VI	nd	st3	nd
B2397	2002	PtxP3	PtxS1-1	Prn_Region1-2	Prn2	Fim3-2	ptxP3-ptxA1-prn2/3-fim32	VII	nd	st3	nd
B2398	2002	PtxP3	PtxS1-1	Prn_Region1-2	Prn2	Fim3-2	ptxP3-ptxA1-prn2/3-fim32	VII	nd	st3	nd
B2399	2002	PtxP3	PtxS1-1	Prn_Region1-2	Prn2	Fim3-1	ptxP3-ptxA1-prn2/3-fim31	VI	nd	st3	nd
B2400	2002	PtxP3	PtxS1-1	Prn_Region1-2	Prn2	Fim3-2	ptxP3-ptxA1-prn2/3-fim32	VII	nd	st3	nd
B2407	2002	PtxP1	PtxS1-1	Prn_Region1-1	Prn1	Fim3-1	ptxP1-ptxA1-prn1-fim31	IV	nd	st2	nd
B2409	2002	PtxP3	PtxS1-1	Prn_Region1-2	Prn2	Fim3-2	ptxP3-ptxA1-prn2/3-fim32	VII	nd	st3	nd
B2414	2002	PtxP1	PtxS1-1	Prn_Region1-1	Prn1	Fim3-4	ptxP1-ptxA1-prn1-fim34	other	nd	st3	5	CGCCGGCCCTAGAGCGAGCCCATTTGTGCAGGCATGGGCGCACCCGCAGACTGTTGCTCGAGCCTCGGAGTACGCAGGACACCGC
B2572	2003	PtxP3	PtxS1-1	Prn_Region1-2	Prn2	Fim3-1	ptxP3-ptxA1-prn2/3-fim31	VI	nd	st3	nd
B2573	2003	PtxP3	PtxS1-1	Prn_Region1-2	Prn2	Fim3-2	ptxP3-ptxA1-prn2/3-fim32	VII	nd	st3	nd
B2574	2003	PtxP3	PtxS1-1	Prn_Region1-2	Prn2	Fim3-2	ptxP3-ptxA1-prn2/3-fim32	VII	nd	st3	nd
B2575	2003	PtxP1	PtxS1-1	Prn_Region1-2	Prn2	Fim3-1	ptxP1-ptxA1-prn2/3-fim31	V	1	st2	7	CGCCAGCCCTAGAGCGAGCCCATTTGTACAGGCATGGGCGCACCCGCAGACTGTTGCTCGAGCCTCGGAGTACGCAGGACACCGC
B2578	2003	PtxP3	PtxS1-1	Prn_Region1-2	Prn2	Fim3-1	ptxP3-ptxA1-prn2/3-fim31	VI	nd	st3	nd
B2579	2003	PtxP3	PtxS1-1	Prn_Region1-2	Prn2	Fim3-2	ptxP3-ptxA1-prn2/3-fim32	VII	nd	st3	nd
B2580	2003	PtxP3	PtxS1-1	Prn_Region1-2	Prn2	Fim3-2	ptxP3-ptxA1-prn2/3-fim32	VII	nd	st3	nd
B2582	2003	PtxP3	PtxS1-1	Prn_Region1-2	Prn2	Fim3-2	ptxP3-ptxA1-prn2/3-fim32	VII	1	st3	12	CGCCAGCCCTAGGGCGAGCCCATTTGTACAAGCGTGGGCGCACCCGCAGGCTGTCGTTCGAGCCTCGGAGTACGCAGAACACTGC
B2583	2003	PtxP3	PtxS1-1	Prn_Region1-2	Prn2	Fim3-2	ptxP3-ptxA1-prn2/3-fim32	VII	nd	st3	12	CGCCAGCCCTAGGGCGAGCCCATTTGTACAAGCGTGGGCGCACCCGCAGGCTGTCGTTCGAGCCTCGGAGTACGCAGAACACTGC
B2584	2003	PtxP3	PtxS1-1	Prn_Region1-2	Prn2	Fim3-1	ptxP3-ptxA1-prn2/3-fim31	VI	1	st3	nd
B2585	2003	PtxP3	PtxS1-1	Prn_Region1-2	Prn2	Fim3-1	ptxP3-ptxA1-prn2/3-fim31	VI	nd	st3	nd
B2591	2003	PtxP3	PtxS1-1	Prn_Region1-2	Prn2	Fim3-2	ptxP3-ptxA1-prn2/3-fim32	VII	nd	st3	nd
B2592	2003	PtxP3	PtxS1-1	Prn_Region1-2	Prn2	Fim3-1	ptxP3-ptxA1-prn2/3-fim31	VI	nd	st3	nd
B2593	2003	PtxP3	PtxS1-1	Prn_Region1-2	Prn2	Fim3-2	ptxP3-ptxA1-prn2/3-fim32	VII	nd	st3	nd
B2715	2004	PtxP3	PtxS1-1	Prn_Region1-2	Prn2	Fim3-2	ptxP3-ptxA1-prn2/3-fim32	VII	1	st3	12	CGCCAGCCCTAGGGCGAGCCCATTTGTACAAGCGTGGGCGCACCCGCAGGCTGTCGTTCGAGCCTCGGAGTACGCAGAACACTGC
B2716	2004	PtxP3	PtxS1-1	Prn_Region1-2	Prn2	Fim3-1	ptxP3-ptxA1-prn2/3-fim31	VI	1	st3	11	CGCCAGCCCTAGGGCGAGCCCATTTGTACAAGCGTGGGCGCACCCGCAGGCTGTTGTTCGAGCCTCGGAGTACGCAGAACACTGC
B2717	2004	PtxP3	PtxS1-1	Prn_Region1-2	Prn2	Fim3-1	ptxP3-ptxA1-prn2/3-fim31	VI	1	st3	11	CGCCAGCCCTAGGGCGAGCCCATTTGTACAAGCGTGGGCGCACCCGCAGGCTGTTGTTCGAGCCTCGGAGTACGCAGAACACTGC
B2718	2004	PtxP3	PtxS1-1	Prn_Region1-2	Prn2	Fim3-2	ptxP3-ptxA1-prn2/3-fim32	VII	1	st3	12	CGCCAGCCCTAGGGCGAGCCCATTTGTACAAGCGTGGGCGCACCCGCAGGCTGTTGTTCGAGCCTCGGAGTACGCAGAACACTGC
B2719	2004	PtxP3	PtxS1-1	Prn_Region1-2	Prn2	Fim3-1	ptxP3-ptxA1-prn2/3-fim31	VI	1	st3	1	CGCCAGCCCTAGGGCGAGCCCATTTGTACAAGCGTGGGCGCACCCGCAGGCTGTTGTTCGAGCCTCGGAGTACGCAGAACACTGC
B2720	2004	PtxP3	PtxS1-1	Prn_Region1-2	Prn2	Fim3-1	ptxP3-ptxA1-prn2/3-fim31	VI	nd	st3	11	CGCCAGCCCTAGGGCGAGCCCATTTGTACAAGCGTGGGCGCACCCGCAGGCTGTTGTTCGAGCCTCGGAGTACGCAGAACACTGC
B2721	2004	PtxP3	PtxS1-1	Prn_Region1-2	Prn2	Fim3-2	ptxP3-ptxA1-prn2/3-fim32	VII	1	st3	12	CGCCAGCCCTAGGGCGAGCCCATTTGTACAAGCGTGGGCGCACCCGCAGGCTGTCGTTCGAGCCTCGGAGTACGCAGAACACTGC
B2723	2004	PtxP3	PtxS1-1	Prn_Region1-2	Prn2	Fim3-2	ptxP3-ptxA1-prn2/3-fim32	VII	1	st3	12	CGCCAGCCCTAGGGCGAGCCCATTTGTACAAGCGTGGGCGCACCCGCAGGCTGTCGTTCGAGCCTCGGAGTACGCAGAACACTGC
B2724	2004	PtxP3	PtxS1-1	Prn_Region1-2	Prn2	Fim3-1	ptxP3-ptxA1-prn2/3-fim31	VI	1	st3	11	CGCCAGCCCTAGGGCGAGCCCATTTGTACAAGCGTGGGCGCACCCGCAGGCTGTTGTTCGAGCCTCGGAGTACGCAGAACACTGC
B2726	2004	PtxP3	PtxS1-1	Prn_Region1-2	Prn2	Fim3-2	ptxP3-ptxA1-prn2/3-fim32	VII	1	st3	12	CGCCAGCCCTAGGGCGAGCCCATTTGTACAAGCGTGGGCGCACCCGCAGGCTGTCGTTCGAGCCTCGGAGTACGCAGAACACTGC
B2729	2004	PtxP3	PtxS1-1	Prn_Region1-2	Prn2	Fim3-2	ptxP3-ptxA1-prn2/3-fim32	VII	nd	st3	12	CGCCAGCCCTAGGGCGAGCCCATTTGTACAAGCGTGGGCGCACCCGCAGGCTGTCGTTCGAGCCTCGGAGTACGCAGAACACTGC
B2741	2004	PtxP3	PtxS1-1	Prn_Region1-2	Prn2	Fim3-1	ptxP3-ptxA1-prn2/3-fim31	VI	nd	st3	11	CGCCAGCCCTAGGGCGAGCCCATTTGTACAAGCGTGGGCGCACCCGCAGGCTGTTGTTCGAGCCTCGGAGTACGCAGAACACTGC
B2745	2004	PtxP3	PtxS1-1	Prn_Region1-2	Prn2	Fim3-1	ptxP3-ptxA1-prn2/3-fim31	VI	nd	st3	11	CGCCAGCCCTAGGGCGAGCCCATTTGTACAAGCGTGGGCGCACCCGCAGGCTGTTGTTCGAGCCTCGGAGTACGCAGAACACTGC
B2748	2004	PtxP3	PtxS1-1	Prn_Region1-2	Prn2	Fim3-2	ptxP3-ptxA1-prn2/3-fim32	VII	1	st3	nd
B2749	2004	PtxP3	PtxS1-1	Prn_Region1-2	Prn2	Fim3-1	ptxP3-ptxA1-prn2/3-fim31	VI	1	st3	11	CGCCAGCCCTAGGGCGAGCCCATTTGTACAAGCGTGGGCGCACCCGCAGGCTGTTGTTCGAGCCTCGGAGTACGCAGAACACTGC
B2752	2004	PtxP3	PtxS1-1	Prn_Region1-2	Prn2	Fim3-2	ptxP3-ptxA1-prn2/3-fim32	VII	nd	st3	12	CGCCAGCCCTAGGGCGAGCCCATTTGTACAAGCGTGGGCGCACCCGCAGGCTGTCGTTCGAGCCTCGGAGTACGCAGAACACTGC
B2753	2004	PtxP3	PtxS1-1	Prn_Region1-2	Prn2	Fim3-1	ptxP3-ptxA1-prn2/3-fim31	VI	1	st3	11	CGCCAGCCCTAGGGCGAGCCCATTTGTACAAGCGTGGGCGCACCCGCAGGCTGTTGTTCGAGCCTCGGAGTACGCAGAACACTGC
B2755	2004	PtxP3	PtxS1-1	Prn_Region1-2	Prn2	Fim3-1	ptxP3-ptxA1-prn2/3-fim31	VI	nd	st3	11	CGCCAGCCCTAGGGCGAGCCCATTTGTACAAGCGTGGGCGCACCCGCAGGCTGTTGTTCGAGCCTCGGAGTACGCAGAACACTGC
B2757	2004	PtxP3	PtxS1-1	Prn_Region1-2	Prn2	Fim3-2	ptxP3-ptxA1-prn2/3-fim32	VII	nd	st3	12	CGCCAGCCCTAGGGCGAGCCCATTTGTACAAGCGTGGGCGCACCCGCAGGCTGTCGTTCGAGCCTCGGAGTACGCAGAACACTGC
B2760	2004	PtxP3	PtxS1-1	Prn_Region1-2	Prn2	Fim3-1	ptxP3-ptxA1-prn2/3-fim31	VI	nd	st3	11	CGCCAGCCCTAGGGCGAGCCCATTTGTACAAGCGTGGGCGCACCCGCAGGCTGTTGTTCGAGCCTCGGAGTACGCAGAACACTGC
B2761	2004	PtxP3	PtxS1-1	Prn_Region1-2	Prn2	Fim3-1	ptxP3-ptxA1-prn2/3-fim31	VI	nd	st3	nd
B2762	2004	PtxP3	PtxS1-1	Prn_Region1-2	Prn2	Fim3-2	ptxP3-ptxA1-prn2/3-fim32	VII	nd	st3	12	CGCCAGCCCTAGGGCGAGCCCATTTGTACAAGCGTGGGCGCACCCGCAGGCTGTCGTTCGAGCCTCGGAGTACGCAGAACACTGC
B2763	2004	PtxP3	PtxS1-1	Prn_Region1-2	Prn2	Fim3-2	ptxP3-ptxA1-prn2/3-fim32	VII	1	st3	12	CGCCAGCCCTAGGGCGAGCCCATTTGTACAAGCGTGGGCGCACCCGCAGGCTGTCGTTCGAGCCTCGGAGTACGCAGAACACTGC
B2766	2004	PtxP3	PtxS1-1	Prn_Region1-2	Prn2	Fim3-1	ptxP3-ptxA1-prn2/3-fim31	VI	nd	st3	11	CGCCAGCCCTAGGGCGAGCCCATTTGTACAAGCGTGGGCGCACCCGCAGGCTGTTGTTCGAGCCTCGGAGTACGCAGAACACTGC
B2769	2004	PtxP3	PtxS1-1	Prn_Region1-2	Prn2	Fim3-1	ptxP3-ptxA1-prn2/3-fim31	VI	nd	st3	nd
B2771	2004	PtxP3	PtxS1-1	Prn_Region1-2	Prn2	Fim3-1	ptxP3-ptxA1-prn2/3-fim31	VI	nd	st3	nd
B2776	2005	PtxP3	PtxS1-1	Prn_Region1-2	Prn2	Fim3-1	ptxP3-ptxA1-prn2/3-fim31	VI	1	st3	nd
B2777	2005	PtxP1	PtxS1-1	Prn_Region1-2	Prn2	Fim3-1	ptxP1-ptxA1-prn2/3-fim31	V	1	st2	nd
B2778	2005	PtxP1	PtxS1-1	Prn_Region1-2	Prn2	Fim3-1	ptxP1-ptxA1-prn2/3-fim31	V	nd	st2	31	CGCCAGCCCTAGAGCGAGCCCATTTGTACAGGCATGGGCGCACCCGCAGACTGTTGCTCGGGCCTCGGAGTACGCAGGACACCGC
B2884	2005	PtxP3	PtxS1-1	Prn_Region1-2	Prn2	Fim3-1	ptxP3-ptxA1-prn2/3-fim31	VI	1	st3	nd
B2885	2005	PtxP3	PtxS1-1	Prn_Region1-2	Prn2	Fim3-1	ptxP3-ptxA1-prn2/3-fim31	VI	1	st3	nd
B2886	2005	PtxP3	PtxS1-1	Prn_Region1-2	Prn2	Fim3-2	ptxP3-ptxA1-prn2/3-fim32	VII	1	st3	12	CGCCAGCCCTAGGGCGAGCCCATTTGTACAAGCGTGGGCGCACCCGCAGGCTGTCGTTCGAGCCTCGGAGTACGCAGAACACTGC
B2887	2005	PtxP3	PtxS1-1	Prn_Region1-2	Prn2	Fim3-1	ptxP3-ptxA1-prn2/3-fim31	VI	nd	st3	nd
B2888	2005	PtxP3	PtxS1-1	Prn_Region1-2	Prn2	Fim3-1	ptxP3-ptxA1-prn2/3-fim31	VI	nd	st3	nd
B2889	2005	PtxP3	PtxS1-1	Prn_Region1-2	Prn2	Fim3-2	ptxP3-ptxA1-prn2/3-fim32	VII	nd	st3	nd
B2890	2005	PtxP3	PtxS1-1	Prn_Region1-2	Prn2	Fim3-1	ptxP3-ptxA1-prn2/3-fim31	VI	1	st3	11	CGCCAGCCCTAGGGCGAGCCCATTTGTACAAGCGTGGGCGCACCCGCAGGCTGTTGTTCGAGCCTCGGAGTACGCAGAACACTGC
B2891	2005	PtxP3	PtxS1-1	Prn_Region1-2	Prn2	Fim3-1	ptxP3-ptxA1-prn2/3-fim31	VI	1	st3	nd
B2897	2005	PtxP3	PtxS1-1	Prn_Region1-2	Prn2	Fim3-1	ptxP3-ptxA1-prn2/3-fim31	VI	1	st3	nd
B2903	2005	PtxP3	PtxS1-1	Prn_Region1-2	Prn2	Fim3-1	ptxP3-ptxA1-prn2/3-fim31	VI	1	st2,3	nd
B2906	2005	PtxP3	PtxS1-1	Prn_Region1-2	Prn2	Fim3-1	ptxP3-ptxA1-prn2/3-fim31	VI	1	st3	nd
B2907	2005	PtxP3	PtxS1-1	Prn_Region1-2	Prn2	Fim3-1	ptxP3-ptxA1-prn2/3-fim31	VI	1	st3	nd
B2908	2005	PtxP3	PtxS1-1	Prn_Region1-2	Prn2	Fim3-1	ptxP3-ptxA1-prn2/3-fim31	VI	1	st3	nd
B2910	2005	PtxP3	PtxS1-1	Prn_Region1-2	Prn2	Fim3-2	ptxP3-ptxA1-prn2/3-fim32	VII	1	st3	nd
B2911	2005	PtxP3	PtxS1-1	Prn_Region1-2	Prn2	Fim3-1	ptxP3-ptxA1-prn2/3-fim31	VI	1	st3	nd
B2912	2005	PtxP3	PtxS1-1	Prn_Region1-2	Prn2	Fim3-1	ptxP3-ptxA1-prn2/3-fim31	VI	1	st3	nd
B2913	2005	PtxP1	PtxS1-1	Prn_Region1-2	Prn2	Fim3-1	ptxP1-ptxA1-prn2/3-fim31	V	1	st2	nd
B2914	2005	PtxP3	PtxS1-1	Prn_Region1-2	Prn2	Fim3-1	ptxP3-ptxA1-prn2/3-fim31	VI	nd	st3	nd
B2915	2005	PtxP3	PtxS1-1	Prn_Region1-2	Prn2	Fim3-1	ptxP3-ptxA1-prn2/3-fim31	VI	1	st3	nd
B2916	2005	PtxP3	PtxS1-1	Prn_Region1-2	Prn2	Fim3-1	ptxP3-ptxA1-prn2/3-fim31	VI	1	st3	nd
B2917	2005	PtxP3	PtxS1-1	Prn_Region1-2	Prn2	Fim3-1	ptxP3-ptxA1-prn2/3-fim31	VI	1	st3	nd
B2918	2005	PtxP3	PtxS1-1	Prn_Region1-2	Prn2	Fim3-2	ptxP3-ptxA1-prn2/3-fim32	VII	1	st3	12	CGCCAGCCCTAGGGCGAGCCCATTTGTACAAGCGTGGGCGCACCCGCAGGCTGTCGTTCGAGCCTCGGAGTACGCAGAACACTGC
B2919	2005	PtxP3	PtxS1-1	Prn_Region1-2	Prn2	Fim3-1	ptxP3-ptxA1-prn2/3-fim31	VI	1	st3	nd
B2920	2005	PtxP3	PtxS1-1	Prn_Region1-2	Prn2	Fim3-1	ptxP3-ptxA1-prn2/3-fim31	VI	1	st3	11	CGCCAGCCCTAGGGCGAGCCCATTTGTACAAGCGTGGGCGCACCCGCAGGCTGTTGTTCGAGCCTCGGAGTACGCAGAACACTGC
B2924	2005	PtxP3	PtxS1-1	Prn_Region1-2	Prn2	Fim3-2	ptxP3-ptxA1-prn2/3-fim32	VII	1	st3	nd
B2925	2005	PtxP3	PtxS1-1	Prn_Region1-2	Prn2	Fim3-1	ptxP3-ptxA1-prn2/3-fim31	VI	1	st3	nd
B2904	2006	PtxP3	PtxS1-1	Prn_Region1-2	Prn2	Fim3-1	ptxP3-ptxA1-prn2/3-fim31	VI	1	st3	nd
B2995	2006	PtxP3	PtxS1-1	Prn_Region1-2	Prn2	Fim3-1	ptxP3-ptxA1-prn2/3-fim31	VI	1	st3	11	CGCCAGCCCTAGGGCGAGCCCATTTGTACAAGCGTGGGCGCACCCGCAGGCTGTTGTTCGAGCCTCGGAGTACGCAGAACACTGC
B3020	2006	PtxP3	PtxS1-1	Prn_Region1-2	Prn2	Fim3-1	ptxP3-ptxA1-prn2/3-fim31	VI	1	st3	nd
B3034	2006	PtxP3	PtxS1-1	Prn_Region1-2	Prn2	Fim3-2	ptxP3-ptxA1-prn2/3-fim32	VII	1	st3	18	CGCCAGCCCTAGGGCGAGCCCATTTGTACAAGCGTGGGCGCACCCGCAGGCTGTCGTTCGAGCCTAGGAGTACGCAGAACACTGC
B3035	2006	PtxP3	PtxS1-1	Prn_Region1-2	Prn2	Fim3-2	ptxP3-ptxA1-prn2/3-fim32	VII	1	nd	nd
B3038	2006	PtxP3	PtxS1-1	Prn_Region1-2	Prn2	Fim3-1	ptxP3-ptxA1-prn2/3-fim31	VI	1	nd	nd
B3039	2006	PtxP3	PtxS1-1	Prn_Region1-2	Prn2	Fim3-1	ptxP3-ptxA1-prn2/3-fim31	VI	1	nd	nd
B3042	2006	PtxP3	PtxS1-1	Prn_Region1-2	Prn2	Fim3-2	ptxP3-ptxA1-prn2/3-fim32	VII	1	nd	nd
B3043	2006	PtxP1	PtxS1-1	Prn_Region1-2	Prn2	Fim3-1	ptxP1-ptxA1-prn2/3-fim31	V	1	nd	nd
B3044	2006	PtxP3	PtxS1-1	Prn_Region1-2	Prn2	Fim3-2	ptxP3-ptxA1-prn2/3-fim32	VII	1	nd	nd
B3045	2006	PtxP3	PtxS1-1	Prn_Region1-2	Prn2	Fim3-2	ptxP3-ptxA1-prn2/3-fim32	VII	1	nd	nd
B3048	2006	PtxP3	PtxS1-1	Prn_Region1-2	Prn2	Fim3-2	ptxP3-ptxA1-prn2/3-fim32	VII	1	nd	nd
B3065	2006	PtxP3	PtxS1-1	Prn_Region1-2	Prn2	Fim3-1	ptxP3-ptxA1-prn2/3-fim31	VI	1	st3	11	CGCCAGCCCTAGGGCGAGCCCATTTGTACAAGCGTGGGCGCACCCGCAGGCTGTTGTTCGAGCCTCGGAGTACGCAGAACACTGC
B3066	2006	PtxP3	PtxS1-1	Prn_Region1-2	Prn2	Fim3-1	ptxP3-ptxA1-prn2/3-fim31	VI	1	st3	nd
B3067	2006	PtxP3	PtxS1-1	Prn_Region1-2	Prn2	Fim3-2	ptxP3-ptxA1-prn2/3-fim32	VII	1	st3	nd
B3068	2006	PtxP1	PtxS1-1	Prn_Region1-2	Prn2	Fim3-1	ptxP1-ptxA1-prn2/3-fim31	V	1	st2	7	CGCCAGCCCTAGAGCGAGCCCATTTGTACAGGCATGGGCGCACCCGCAGACTGTTGCTCGAGCCTCGGAGTACGCAGGACACCGC
B3070	2006	PtxP3	PtxS1-1	Prn_Region1-2	Prn2	Fim3-1	ptxP3-ptxA1-prn2/3-fim31	VI	1	st3	nd
B3071	2006	PtxP3	PtxS1-1	Prn_Region1-2	Prn2	Fim3-1	ptxP3-ptxA1-prn2/3-fim31	VI	1	st3	nd
B3072	2006	PtxP3	PtxS1-1	Prn_Region1-2	Prn2	Fim3-1	ptxP3-ptxA1-prn2/3-fim31	VI	1	st3	nd
B3073	2006	PtxP3	PtxS1-1	Prn_Region1-2	Prn2	Fim3-1	ptxP3-ptxA1-prn2/3-fim31	VI	1	st3	nd
B3074	2006	PtxP3	PtxS1-1	Prn_Region1-2	Prn2	Fim3-1	ptxP3-ptxA1-prn2/3-fim31	VI	1	st3	nd
B3075	2006	PtxP3	PtxS1-1	Prn_Region1-2	Prn2	Fim3-1	ptxP3-ptxA1-prn2/3-fim31	VI	1	st3	11	CGCCAGCCCTAGGGCGAGCCCATTTGTACAAGCGTGGGCGCACCCGCAGGCTGTTGTTCGAGCCTCGGAGTACGCAGAACACTGC
B3076	2006	PtxP3	PtxS1-1	Prn_Region1-2	Prn2	Fim3-1	ptxP3-ptxA1-prn2/3-fim31	VI	1	st3	nd
B3095	2006	PtxP3	PtxS1-1	Prn_Region1-2	Prn2	Fim3-1	ptxP3-ptxA1-prn2/3-fim31	VI	1	st3	nd
B3096	2006	PtxP3	PtxS1-1	Prn_Region1-2	Prn2	Fim3-1	ptxP3-ptxA1-prn2/3-fim31	VI	1	st3	nd
B3097	2006	PtxP3	PtxS1-1	Prn_Region1-2	Prn2	Fim3-1	ptxP3-ptxA1-prn2/3-fim31	VI	1	st3	nd
B3103	2007	PtxP3	PtxS1-1	Prn_Region1-2	Prn2	Fim3-1	ptxP3-ptxA1-prn2/3-fim31	VI	1	st0	nd
B3104	2007	PtxP3	PtxS1-1	Prn_Region1-2	Prn2	Fim3-1	ptxP3-ptxA1-prn2/3-fim31	VI	1	st3	11	CGCCAGCCCTAGGGCGAGCCCATTTGTACAAGCGTGGGCGCACCCGCAGGCTGTTGTTCGAGCCTCGGAGTACGCAGAACACTGC
B3107	2007	PtxP3	PtxS1-1	Prn_Region1-2	Prn2	Fim3-1	ptxP3-ptxA1-prn2/3-fim31	VI	1	st3	11	CGCCAGCCCTAGGGCGAGCCCATTTGTACAAGCGTGGGCGCACCCGCAGGCTGTTGTTCGAGCCTCGGAGTACGCAGAACACTGC
B3111	2007	PtxP3	PtxS1-1	Prn_Region1-2	Prn2	Fim3-1	ptxP3-ptxA1-prn2/3-fim31	VI	1	st3	11	CGCCAGCCCTAGGGCGAGCCCATTTGTACAAGCGTGGGCGCACCCGCAGGCTGTTGTTCGAGCCTCGGAGTACGCAGAACACTGC
B3112	2007	PtxP3	PtxS1-1	Prn_Region1-2	Prn2	Fim3-1	ptxP3-ptxA1-prn2/3-fim31	VI	1	st3	nd
B3113	2007	PtxP3	PtxS1-1	Prn_Region1-2	Prn2	Fim3-1	ptxP3-ptxA1-prn2/3-fim31	VI	1	st3	11	CGCCAGCCCTAGGGCGAGCCCATTTGTACAAGCGTGGGCGCACCCGCAGGCTGTTGTTCGAGCCTCGGAGTACGCAGAACACTGC
B3117	2007	PtxP3	PtxS1-1	Prn_Region1-2	Prn2	Fim3-2	ptxP3-ptxA1-prn2/3-fim32	VII	1	st3	nd
B3119	2007	PtxP3	PtxS1-1	Prn_Region1-2	Prn2	Fim3-1	ptxP3-ptxA1-prn2/3-fim31	VI	1	st3	nd
B3121	2007	PtxP3	PtxS1-1	Prn_Region1-2	Prn2	Fim3-1	ptxP3-ptxA1-prn2/3-fim31	VI	1	st3	11	CGCCAGCCCTAGGGCGAGCCCATTTGTACAAGCGTGGGCGCACCCGCAGGCTGTTGTTCGAGCCTCGGAGTACGCAGAACACTGC
B3122	2007	PtxP3	PtxS1-1	Prn_Region1-2	Prn2	Fim3-1	ptxP3-ptxA1-prn2/3-fim31	VI	1	st3	11	CGCCAGCCCTAGGGCGAGCCCATTTGTACAAGCGTGGGCGCACCCGCAGGCTGTTGTTCGAGCCTCGGAGTACGCAGAACACTGC
B3123	2007	PtxP3	PtxS1-1	Prn_Region1-2	Prn2	Fim3-1	ptxP3-ptxA1-prn2/3-fim31	VI	1	st3	11	CGCCAGCCCTAGGGCGAGCCCATTTGTACAAGCGTGGGCGCACCCGCAGGCTGTTGTTCGAGCCTCGGAGTACGCAGAACACTGC
B3124	2007	PtxP1	PtxS1-1	Prn_Region1-2	Prn2	Fim3-1	ptxP1-ptxA1-prn2/3-fim31	V	1	st2	7	CGCCAGCCCTAGAGCGAGCCCATTTGTACAGGCATGGGCGCACCCGCAGACTGTTGCTCGAGCCTCGGAGTACGCAGGACACCGC
B3125	2007	PtxP3	PtxS1-1	Prn_Region1-2	Prn2	Fim3-1	ptxP3-ptxA1-prn2/3-fim31	VI	1	st3	nd
B3126	2007	PtxP3	PtxS1-1	Prn_Region1-2	Prn2	Fim3-1	ptxP3-ptxA1-prn2/3-fim31	VI	1	st3	11	CGCCAGCCCTAGGGCGAGCCCATTTGTACAAGCGTGGGCGCACCCGCAGGCTGTTGTTCGAGCCTCGGAGTACGCAGAACACTGC
B3128	2007	PtxP3	PtxS1-1	Prn_Region1-2	Prn2	Fim3-1	ptxP3-ptxA1-prn2/3-fim31	VI	1	st3	11	CGCCAGCCCTAGGGCGAGCCCATTTGTACAAGCGTGGGCGCACCCGCAGGCTGTTGTTCGAGCCTCGGAGTACGCAGAACACTGC
B3132	2007	PtxP3	PtxS1-1	Prn_Region1-2	Prn2	Fim3-2	ptxP3-ptxA1-prn2/3-fim32	VII	1	st3	12	CGCCAGCCCTAGGGCGAGCCCATTTGTACAAGCGTGGGCGCACCCGCAGGCTGTCGTTCGAGCCTCGGAGTACGCAGAACACTGC
B3135	2007	PtxP3	PtxS1-1	Prn_Region1-2	Prn2	Fim3-1	ptxP3-ptxA1-prn2/3-fim31	VI	1	st3	nd
B3138	2007	PtxP3	PtxS1-1	Prn_Region1-2	Prn2	Fim3-2	ptxP3-ptxA1-prn2/3-fim32	VII	1	st3	nd
B3141	2007	PtxP3	PtxS1-1	Prn_Region1-2	Prn2	Fim3-1	ptxP3-ptxA1-prn2/3-fim31	VI	1	st3	11	CGCCAGCCCTAGGGCGAGCCCATTTGTACAAGCGTGGGCGCACCCGCAGGCTGTTGTTCGAGCCTCGGAGTACGCAGAACACTGC
B3145	2007	PtxP3	PtxS1-1	Prn_Region1-2	Prn2	Fim3-1	ptxP3-ptxA1-prn2/3-fim31	VI	1	st3	nd
B3146	2007	PtxP3	PtxS1-1	Prn_Region1-2	Prn2	Fim3-1	ptxP3-ptxA1-prn2/3-fim31	VI	1	st3	11	CGCCAGCCCTAGGGCGAGCCCATTTGTACAAGCGTGGGCGCACCCGCAGGCTGTTGTTCGAGCCTCGGAGTACGCAGAACACTGC
B3147	2007	PtxP3	PtxS1-1	Prn_Region1-2	Prn2	Fim3-1	ptxP3-ptxA1-prn2/3-fim31	VI	1	st3	nd
B3148	2007	PtxP3	PtxS1-1	Prn_Region1-2	Prn2	Fim3-1	ptxP3-ptxA1-prn2/3-fim31	VI	1	st3	11	CGCCAGCCCTAGGGCGAGCCCATTTGTACAAGCGTGGGCGCACCCGCAGGCTGTTGTTCGAGCCTCGGAGTACGCAGAACACTGC
B3173	2007	PtxP3	PtxS1-1	Prn_Region1-2	Prn2	Fim3-1	ptxP3-ptxA1-prn2/3-fim31	VI	1	st3	11	CGCCAGCCCTAGGGCGAGCCCATTTGTACAAGCGTGGGCGCACCCGCAGGCTGTTGTTCGAGCCTCGGAGTACGCAGAACACTGC
B3216	2007	PtxP3	PtxS1-1	Prn_Region1-2	Prn2	Fim3-1	ptxP3-ptxA1-prn2/3-fim31	VI	1	st3	nd
B3217	2007	PtxP3	PtxS1-1	Prn_Region1-2	Prn2	Fim3-1	ptxP3-ptxA1-prn2/3-fim31	VI	1	st3	11	CGCCAGCCCTAGGGCGAGCCCATTTGTACAAGCGTGGGCGCACCCGCAGGCTGTTGTTCGAGCCTCGGAGTACGCAGAACACTGC
B3218	2007	PtxP3	PtxS1-1	Prn_Region1-2	Prn2	Fim3-2	ptxP3-ptxA1-prn2/3-fim32	VII	1	st3	12	CGCCAGCCCTAGGGCGAGCCCATTTGTACAAGCGTGGGCGCACCCGCAGGCTGTCGTTCGAGCCTCGGAGTACGCAGAACACTGC
B3179	2008	PtxP3	PtxS1-1	Prn_Region1-2	Prn2	Fim3-1	ptxP3-ptxA1-prn2/3-fim31	VI	1	st3	nd
B3183	2008	PtxP3	PtxS1-1	Prn_Region1-2	Prn2	Fim3-1	ptxP3-ptxA1-prn2/3-fim31	VI	1	st3	11	CGCCAGCCCTAGGGCGAGCCCATTTGTACAAGCGTGGGCGCACCCGCAGGCTGTTGTTCGAGCCTCGGAGTACGCAGAACACTGC
B3203	2008	PtxP3	PtxS1-1	Prn_Region1-2	Prn2	Fim3-2	ptxP3-ptxA1-prn2/3-fim32	VII	1	st3	nd
B3206	2008	PtxP1	PtxS1-1	Prn_Region1-2	Prn2	Fim3-1	ptxP1-ptxA1-prn2/3-fim31	V	1	st2	31	CGCCAGCCCTAGAGCGAGCCCATTTGTACAGGCATGGGCGCACCCGCAGACTGTTGCTCGGGCCTCGGAGTACGCAGGACACCGC
B3209	2008	PtxP1	PtxS1-1	Prn_Region1-2	Prn2	Fim3-1	ptxP1-ptxA1-prn2/3-fim31	V	1	st2	nd
B3212	2008	PtxP1	PtxS1-1	Prn_Region1-2	Prn2	Fim3-1	ptxP1-ptxA1-prn2/3-fim31	V	1	st0	31	CGCCAGCCCTAGAGCGAGCCCATTTGTACAGGCATGGGCGCACCCGCAGACTGTTGCTCGGGCCTCGGAGTACGCAGGACACCGC
B3214	2008	PtxP1	PtxS1-1	Prn_Region1-2	Prn2	Fim3-1	ptxP1-ptxA1-prn2/3-fim31	V	1	st2	31	CGCCAGCCCTAGAGCGAGCCCATTTGTACAGGCATGGGCGCACCCGCAGACTGTTGCTCGGGCCTCGGAGTACGCAGGACACCGC
B3219	2008	PtxP3	PtxS1-1	Prn_Region1-2	Prn2	Fim3-2	ptxP3-ptxA1-prn2/3-fim32	VII	1	st3	12	CGCCAGCCCTAGGGCGAGCCCATTTGTACAAGCGTGGGCGCACCCGCAGGCTGTCGTTCGAGCCTCGGAGTACGCAGAACACTGC
B3220	2008	PtxP3	PtxS1-1	Prn_Region1-2	Prn2	Fim3-1	ptxP3-ptxA1-prn2/3-fim31	VI	1	st2	11	CGCCAGCCCTAGGGCGAGCCCATTTGTACAAGCGTGGGCGCACCCGCAGGCTGTTGTTCGAGCCTCGGAGTACGCAGAACACTGC
B3223	2008	PtxP3	PtxS1-1	Prn_Region1-2	Prn2	Fim3-1	ptxP3-ptxA1-prn2/3-fim31	VI	1	st3	nd
B3229	2008	PtxP3	PtxS1-1	Prn_Region1-2	Prn2	Fim3-2	ptxP3-ptxA1-prn2/3-fim32	VII	1	st0	12	CGCCAGCCCTAGGGCGAGCCCATTTGTACAAGCGTGGGCGCACCCGCAGGCTGTCGTTCGAGCCTCGGAGTACGCAGAACACTGC
B3233	2008	PtxP3	PtxS1-1	Prn_Region1-2	Prn2	Fim3-1	ptxP3-ptxA1-prn2/3-fim31	VI	1	st3	nd
B3234	2008	PtxP1	PtxS1-1	Prn_Region1-2	Prn2	Fim3-1	ptxP1-ptxA1-prn2/3-fim31	V	1	st2,3	7	CGCCAGCCCTAGAGCGAGCCCATTTGTACAGGCATGGGCGCACCCGCAGACTGTTGCTCGAGCCTCGGAGTACGCAGGACACCGC
B3235	2008	PtxP13	PtxS1-1	Prn_Region1-2	Prn2	Fim3-1	ptxP13-ptxA1-prn2/3-fim31	other	1	st2	nd
B3236	2008	PtxP3	PtxS1-1	Prn_Region1-2	Prn2	Fim3-1	ptxP3-ptxA1-prn2/3-fim31	VI	1	st2	11	CGCCAGCCCTAGGGCGAGCCCATTTGTACAAGCGTGGGCGCACCCGCAGGCTGTTGTTCGAGCCTCGGAGTACGCAGAACACTGC
B3237	2008	PtxP13	PtxS1-1	Prn_Region1-2	Prn2	Fim3-1	ptxP13-ptxA1-prn2/3-fim31	other	1	st2	nd
B3240	2008	PtxP1	PtxS1-1	Prn_Region1-2	Prn2	Fim3-1	ptxP1-ptxA1-prn2/3-fim31	V	1	st2	nd
B3241	2008	PtxP3	PtxS1-1	Prn_Region1-2	Prn2	Fim3-1	ptxP3-ptxA1-prn2/3-fim31	VI	1	st3	11	CGCCAGCCCTAGGGCGAGCCCATTTGTACAAGCGTGGGCGCACCCGCAGGCTGTTGTTCGAGCCTCGGAGTACGCAGAACACTGC
B3259	2008	PtxP3	PtxS1-1	Prn_Region1-2	Prn2	Fim3-1	ptxP3-ptxA1-prn2/3-fim31	VI	1	st0	nd
B3262	2008	PtxP3	PtxS1-1	Prn_Region1-2	Prn2	Fim3-1	ptxP3-ptxA1-prn2/3-fim31	VI	1	st2	nd
B3263	2008	PtxP3	PtxS1-1	Prn_Region1-2	Prn2	Fim3-1	ptxP3-ptxA1-prn2/3-fim31	VI	1	st3	nd
B3264	2008	PtxP3	PtxS1-1	Prn_Region1-2	Prn2	Fim3-1	ptxP3-ptxA1-prn2/3-fim31	VI	1	st2	nd
B3266	2008	PtxP3	PtxS1-1	Prn_Region1-2	Prn2	Fim3-1	ptxP3-ptxA1-prn2/3-fim31	VI	1	st3	nd
B3267	2008	PtxP3	PtxS1-1	Prn_Region1-2	Prn2	Fim3-1	ptxP3-ptxA1-prn2/3-fim31	VI	1	st2,3	nd
B3270	2008	PtxP3	PtxS1-1	Prn_Region1-2	Prn2	Fim3-1	ptxP3-ptxA1-prn2/3-fim31	VI	1	st3	nd
B3271	2008	PtxP3	PtxS1-1	Prn_Region1-2	Prn2	Fim3-1	ptxP3-ptxA1-prn2/3-fim31	VI	1	st3	nd
B3272	2008	PtxP3	PtxS1-1	Prn_Region1-2	Prn2	Fim3-1	ptxP3-ptxA1-prn2/3-fim31	VI	1	st2,3	nd
B3273	2008	PtxP3	PtxS1-1	Prn_Region1-2	Prn2	Fim3-1	ptxP3-ptxA1-prn2/3-fim31	VI	1	st2	nd
B3274	2008	PtxP3	PtxS1-1	Prn_Region1-2	Prn2	Fim3-1	ptxP3-ptxA1-prn2/3-fim31	VI	1	st3	nd
B3293	2008	PtxP3	PtxS1-1	Prn_Region1-2	Prn2	Fim3-1	ptxP3-ptxA1-prn2/3-fim31	VI	1	st3	nd
B3294	2008	PtxP3	PtxS1-1	Prn_Region1-2	Prn2	Fim3-1	ptxP3-ptxA1-prn2/3-fim31	VI	1	st3	nd
B3295	2008	PtxP3	PtxS1-1	Prn_Region1-2	Prn2	Fim3-1	ptxP3-ptxA1-prn2/3-fim31	VI	1	st2	nd
B3296	2008	PtxP3	PtxS1-1	Prn_Region1-2	Prn2	Fim3-1	ptxP3-ptxA1-prn2/3-fim31	VI	1	st2,3	nd
B3297	2008	PtxP1	PtxS1-1	Prn_Region1-2	Prn2	Fim3-1	ptxP1-ptxA1-prn2/3-fim31	V	1	st2	nd
B3313	2009	PtxP3	PtxS1-1	Prn_Region1-2	Prn2	Fim3-1	ptxP3-ptxA1-prn2/3-fim31	VI	1	st2,3	nd
B3315	2009	PtxP3	PtxS1-1	Prn_Region1-2	Prn2	Fim3-1	ptxP3-ptxA1-prn2/3-fim31	VI	1	st3	nd
B3317	2009	PtxP3	PtxS1-1	Prn_Region1-2	Prn2	Fim3-1	ptxP3-ptxA1-prn2/3-fim31	VI	1	st3	nd
B3321	2009	PtxP3	PtxS1-1	Prn_Region1-2	Prn2	Fim3-1	ptxP3-ptxA1-prn2/3-fim31	VI	1	st2	nd
B3322	2009	PtxP3	PtxS1-1	Prn_Region1-2	Prn2	Fim3-1	ptxP3-ptxA1-prn2/3-fim31	VI	1	st0	nd
B3323	2009	PtxP3	PtxS1-1	Prn_Region1-2	Prn2	Fim3-1	ptxP3-ptxA1-prn2/3-fim31	VI	1	st2	nd
B3325	2009	PtxP3	PtxS1-1	Prn_Region1-2	Prn2	Fim3-1	ptxP3-ptxA1-prn2/3-fim31	VI	1	st2	nd
B3326	2009	PtxP3	PtxS1-1	Prn_Region1-2	Prn2	Fim3-1	ptxP3-ptxA1-prn2/3-fim31	VI	1	st3	nd
B3327	2009	PtxP3	PtxS1-1	Prn_Region1-2	Prn2	Fim3-1	ptxP3-ptxA1-prn2/3-fim31	VI	1	st3	nd
B3328	2009	PtxP3	PtxS1-1	Prn_Region1-2	Prn2	Fim3-1	ptxP3-ptxA1-prn2/3-fim31	VI	1	st3	nd
B3329	2009	PtxP3	PtxS1-1	Prn_Region1-2	Prn2	Fim3-1	ptxP3-ptxA1-prn2/3-fim31	VI	1	st3	nd
B3331	2009	PtxP3	PtxS1-1	Prn_Region1-2	Prn2	Fim3-1	ptxP3-ptxA1-prn2/3-fim31	VI	1	st2	nd
B3338	2009	PtxP3	PtxS1-1	Prn_Region1-2	Prn2	Fim3-1	ptxP3-ptxA1-prn2/3-fim31	VI	1	st2,3	nd
B3339	2009	PtxP3	PtxS1-1	Prn_Region1-2	Prn2	Fim3-1	ptxP3-ptxA1-prn2/3-fim31	VI	1	st2,3	nd
B3341	2009	PtxP3	PtxS1-1	Prn_Region1-2	Prn2	Fim3-1	ptxP3-ptxA1-prn2/3-fim31	VI	1	st2,3	nd
B3346	2009	PtxP3	PtxS1-1	Prn_Region1-2	Prn2	Fim3-1	ptxP3-ptxA1-prn2/3-fim31	VI	1	st2	nd
B3348	2009	PtxP1	PtxS1-1	Prn_Region1-2	Prn2	Fim3-1	ptxP1-ptxA1-prn2/3-fim31	V	1	st2	nd
B3350	2009	PtxP3	PtxS1-1	Prn_Region1-2	Prn2	Fim3-1	ptxP3-ptxA1-prn2/3-fim31	VI	1	st2	nd
B3359	2009	PtxP3	PtxS1-1	Prn_Region1-2	Prn2	Fim3-1	ptxP3-ptxA1-prn2/3-fim31	VI	1	st2	nd
B3360	2009	PtxP3	PtxS1-1	Prn_Region1-2	Prn2	Fim3-1	ptxP3-ptxA1-prn2/3-fim31	VI	1	st2	nd
B3361	2009	PtxP3	PtxS1-1	Prn_Region1-2	Prn2	Fim3-1	ptxP3-ptxA1-prn2/3-fim31	VI	nd	st2	nd
B3362	2009	PtxP3	PtxS1-1	Prn_Region1-2	Prn2	Fim3-1	ptxP3-ptxA1-prn2/3-fim31	VI	1	st2	nd
B3363	2009	PtxP3	PtxS1-1	Prn_Region1-2	Prn2	Fim3-1	ptxP3-ptxA1-prn2/3-fim31	VI	nd	st2	nd
B3364	2009	PtxP3	PtxS1-1	Prn_Region1-2	Prn2	Fim3-1	ptxP3-ptxA1-prn2/3-fim31	VI	1	st2	nd
B3369	2009	PtxP3	PtxS1-1	Prn_Region1-2	Prn2	Fim3-1	ptxP3-ptxA1-prn2/3-fim31	VI	nd	st2	nd
B3370	2009	PtxP3	PtxS1-1	Prn_Region1-2	Prn2	Fim3-1	ptxP3-ptxA1-prn2/3-fim31	VI	1	st2	nd
B3373	2009	PtxP3	PtxS1-1	Prn_Region1-2	Prn2	Fim3-1	ptxP3-ptxA1-prn2/3-fim31	VI	nd	st2	nd
B3374	2009	PtxP3	PtxS1-1	Prn_Region1-2	Prn2	Fim3-1	ptxP3-ptxA1-prn2/3-fim31	VI	nd	st2	nd
B3391	2009	PtxP3	PtxS1-1	Prn_Region1-2	Prn2	Fim3-1	ptxP3-ptxA1-prn2/3-fim31	VI	1	st2	nd
B3395	2009	PtxP3	PtxS1-1	Prn_Region1-2	Prn2	Fim3-1	ptxP3-ptxA1-prn2/3-fim31	VI	1	st2	nd
B3401	2009	PtxP3	PtxS1-1	Prn_Region1-2	Prn2	Fim3-1	ptxP3-ptxA1-prn2/3-fim31	VI	1	st2	nd
B3405	2010	PtxP3	PtxS1-1	Prn_Region1-2	Prn2	Fim3-1	ptxP3-ptxA1-prn2/3-fim31	VI	1	st2	nd
B3406	2010	PtxP3	PtxS1-1	Prn_Region1-2	Prn2	Fim3-1	ptxP3-ptxA1-prn2/3-fim31	VI	1	st2	nd
B3410	2010	PtxP3	PtxS1-1	Prn_Region1-2	Prn2	Fim3-1	ptxP3-ptxA1-prn2/3-fim31	VI	1	st2	nd
B3411	2010	PtxP3	PtxS1-1	Prn_Region1-2	Prn2	Fim3-1	ptxP3-ptxA1-prn2/3-fim31	VI	1	st2	nd
B3415	2010	PtxP3	PtxS1-1	Prn_Region1-2	Prn2	Fim3-1	ptxP3-ptxA1-prn2/3-fim31	VI	1	st2	nd
B3445	2010	PtxP3	PtxS1-1	Prn_Region1-2	Prn2	Fim3-1	ptxP3-ptxA1-prn2/3-fim31	VI	1	st2	nd
B3446	2010	PtxP3	PtxS1-1	Prn_Region1-2	Prn2	Fim3-1	ptxP3-ptxA1-prn2/3-fim31	VI	1	st2	nd
B3447	2010	PtxP3	PtxS1-1	Prn_Region1-2	Prn2	Fim3-1	ptxP3-ptxA1-prn2/3-fim31	VI	1	st2	nd
B3448	2010	PtxP3	PtxS1-1	Prn_Region1-2	Prn2	Fim3-1	ptxP3-ptxA1-prn2/3-fim31	VI	1	st2	nd
B3449	2010	PtxP3	PtxS1-1	Prn_Region1-2	Prn2	Fim3-1	ptxP3-ptxA1-prn2/3-fim31	VI	1	st2	nd
B3605	2010	PtxP3	PtxS1-1	Prn_Region1-2	Prn2	Fim3-1	ptxP3-ptxA1-prn2/3-fim31	VI	1	st2	nd
B3606	2010	PtxP3	PtxS1-1	Prn_Region1-2	Prn2	Fim3-1	ptxP3-ptxA1-prn2/3-fim31	VI	1	st3	nd
B3607	2010	PtxP3	PtxS1-1	Prn_Region1-2	Prn2	Fim3-1	ptxP3-ptxA1-prn2/3-fim31	VI	1	st2	nd
B3608	2010	PtxP3	PtxS1-1	Prn_Region1-2	Prn2	Fim3-1	ptxP3-ptxA1-prn2/3-fim31	VI	1	st2	nd
B3609	2010	PtxP3	PtxS1-1	Prn_Region1-2	Prn2	Fim3-1	ptxP3-ptxA1-prn2/3-fim31	VI	1	st2	nd
B3610	2010	PtxP3	PtxS1-1	Prn_Region1-2	Prn2	Fim3-1	ptxP3-ptxA1-prn2/3-fim31	VI	1	st2	nd
B3611	2010	PtxP3	PtxS1-1	Prn_Region1-2	Prn2	Fim3-1	ptxP3-ptxA1-prn2/3-fim31	VI	1	st0	nd
