# Supplementary material for: Small Mutations in Bordetella pertussis Are Associated with Selective Sweeps
Source: PLoS One. 2012 Sep 28;7(9):e46407. doi: 10.1371/journal.pone.0046407 (PMC3460923; doi:10.1371/journal.pone.0046407)
Supplement: Table S2 — 85 SNPs used in this study. The locus containing the SNP, the position of the SNP in the ORF and the reference position in Tohama I are indicated. Abbreviation: SNP, single nucleotide polymorphism. (XLS) [file pone.0046407.s003.xls]

## Sheet: Sheet1
SNP	Locus	Reference position	Position in Tohama I
1	BP0013	252	10764
2	BP0033	378	37390
3	BP0074	769	72405
4	BP0183	972	183396
5	BP0215	870	220937
6	BP0347	1006	349841
7	BP0371	142	372931
8	BP0418	393	419085
9	BP0420	432	421221
10	BP0475	2480	486005
11	BP0553	363	560519
12	BP0570	405	576540
13	BP0678	6	694521
14	BP0700	411	713901
15	BP0705	672	720190
16	BP0760	2674	778901
17	BP0821	1308	848023
18	BP0827	829	857266
19	BP0888	711	926293
20	BP0905	1128	941632
21	BP0999	1800	1045401
22	BP1014	1179	1059382
23	BP1040	735	1082960
24	BP1046	1326	1088944
25	BP1052	273	1096037
26	BP1119	530	1175956
27	BP1143	15	1206104
28	BP1227	225	1290405
29	BP1246	729	1310166
30	BP1260	2576	1327960
31	BP1261	1239	1331840
32	BP1400	675	1474683
33	BP1466	108	1542772
34	BP1471	5	1547488
35	BP1497	438	1575206
36	BP1515	87	1591043
37	BP1539	604	1613367
38	BP1570	700	1649623
39	BP1573	333	1652706
40	BP1610	243	1691029
41	BP1691	2043	1777467
42	BP1795	707	1885417
43	BP1883	356	1984103
44	BP1989	309	2102498
45	BP1998	146	2109674
46	BP2076	3221	2198097
47	BP2081	1437	2203385
48	BP2228	111	2353874
49	BP2236	117	2365791
50	BP2249	341	2374322
51	BP2332	3343	2465295
52	BP2334	2491	2471200
53	BP2348	78	2488085
54	BP2358	620	2497937
55	BP2366	625	2505238
56	BP2439	918	2581557
57	BP2502	194	2651008
58	BP2585	588	2736088
59	BP2684	765	2848804
60	BP2707	702	2873659
61	BP2713	246	2879950
62	BP2799	390	2973877
63	BP2851	66	3027750
64	BP2931	372	3119113
65	BP2935	637	3123720
66	BP3015	817	3207058
67	BP3021	939	3213181
68	BP3040	717	3240976
69	BP3059	441	3260282
70	BP3074	519	3276536
71	BP3126	408	3331087
72	BP3140	60	3347952
73	BP3424	114	3633049
74	BP3439	3235	3650318
75	BP3526	1248	3737702
76	BP3562	46	3777689
77	BP3594	2008	3809434
78	BP3630	150	3840411
79	BP3642	681	3846833
80	BP3655	1107	3861060
81	BP3657	339	3863253
82	BP3743	285	3950507
83	BP3787	681	3991376
84	BP3789	303	3992064
85	BP3813	330	4020142
